# Supplementary material
Source: PubMed Central journal article supplement (PMC8041326)
Supplement: awaa374_supplementary_data.pdf [file awaa374_supplementary_data.pdf]

**Supplementary Figure 1. Uncoloured brainstem regions and nuclei targeted by DBS.**

Brainstem regions and nuclei that have been targeted by DBS are shown on a high resolution brain template (7 Tesla, 100 micron resolution brain in MNI152 (nonlin asym) space).

Brainstem targets (taken from the Harvard Ascending Arousal Network atlas or constructed from Human Connectome Project imaging

data (<http://www.humanconnectomeproject.org/>) are labelled in two planes (axial - top left panel; sagittal - top right and bottom panels). Dotted lines denote the anatomical level displayed in panels bordered by the corresponding colour (e.g. the blue dotted line denotes the level of the axial slice displayed in the top left panel). Abbreviations. **DBS** = deep brain stimulation; **LC** = locus coeruleus; **MFB** = medial forebrain bundle; **mRF** = mesencephalic reticular formation; **PAG** = periaqueductal gray; **PBC** = parabrachial complex; **PPN** = pedunculopontine nucleus; **RN** = red nucleus; **SCP** = superior cerebellar peduncles; **SN** = substantia nigra; **VTA** = ventral tegmental area.

**Axial**  
 $z = -10.7$

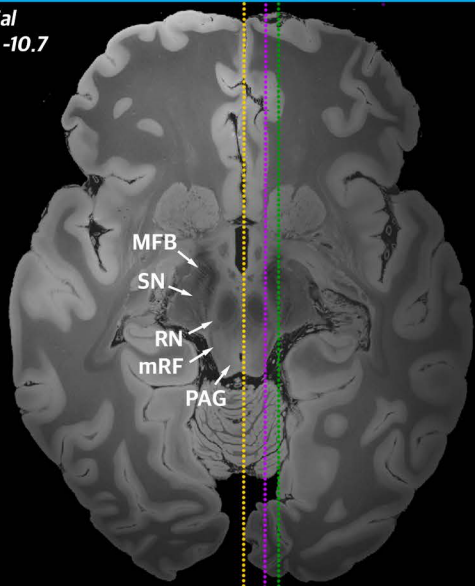

**Sagittal**  
 $x = -9.3$

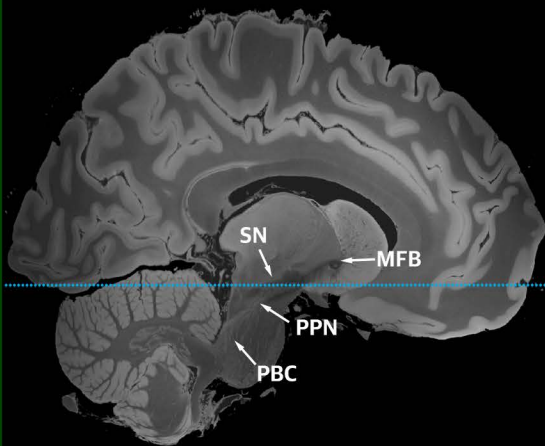

**Sagittal**  
 $x = 0.0$

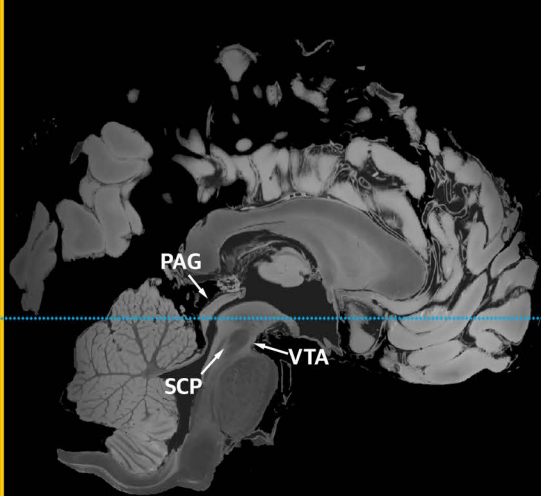

**Sagittal**  
 $x = -6.5$

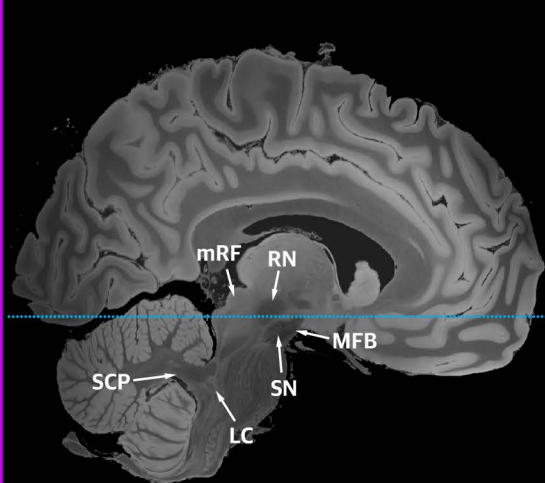

**Table 1 - Clinical outcomes of Brainstem DBS.** Table cataloguing the sustained/long-term clinical outcomes of stimulation of brainstem targets, as reported by brainstem DBS studies.

| Study                        | n  | Etiology                                                        | Indication for DBS     | Targets                                                                                                                       | Stimulation parameters                                                       | Follow-up time   | Reported outcome                                                                                                                                                                                                                                                                                                                              |
|------------------------------|----|-----------------------------------------------------------------|------------------------|-------------------------------------------------------------------------------------------------------------------------------|------------------------------------------------------------------------------|------------------|-----------------------------------------------------------------------------------------------------------------------------------------------------------------------------------------------------------------------------------------------------------------------------------------------------------------------------------------------|
| <b>SUBSTANTIA NIGRA (SN)</b> |    |                                                                 |                        |                                                                                                                               |                                                                              |                  |                                                                                                                                                                                                                                                                                                                                               |
| Weiss et al. 2013            | 12 | PD                                                              | Axial motor impairment | STN, STN & SN                                                                                                                 | SNr: 125 Hz, 60 $\mu$ s, 0.7-3.0 V<br>STN: 125 Hz, 60-180 $\mu$ s, 1.4-4.6 V | 3 weeks          | No significant differences in axial motor impairment, gait or quality of life between baseline, STN stimulation, and combined STN/SNr stimulation                                                                                                                                                                                             |
| Ulla et al. 2011             | 5  | PD                                                              | Parkinsonism           | STN (retrospective localization to SN)                                                                                        | 130 Hz, 60 $\mu$ s, 2-4 V                                                    | 6 month          | Chronic SN stimulation not performed                                                                                                                                                                                                                                                                                                          |
| Wille et al. 2011            | 5  | PME                                                             | Seizure                | Bilateral STN/SN pars reticulata (n=1), bilateral STN/SN pars reticulata & bilateral VIM (n=4)                                | 100-110 Hz, 60-120 $\mu$ s, 1.8-4 V (at 12 months)                           | 12-42 months     | Sustained partial or complete myoclonus reduction (30-100% reduction) in all patients; best clinical effects seen with STN/SN-DBS                                                                                                                                                                                                             |
|                              | 1  | PME                                                             | Seizure                | Bilateral STN/SN pars reticulata                                                                                              |                                                                              | 42 months        | Sustained partial myoclonus reduction                                                                                                                                                                                                                                                                                                         |
|                              | 4  | PME                                                             | Seizure                | Bilateral STN/SN pars reticulata & bilateral VIM                                                                              |                                                                              | 12-32 months     | Sustained complete myoclonus suppression in 1 patient; sustained partial myoclonus reduction in 3 patients                                                                                                                                                                                                                                    |
| Blomstedt et al. 2009        | 1  | PD                                                              | PD                     | R STN/SN (intra-operatively), bilateral STN                                                                                   | 120 Hz, 60 $\mu$ s, 2V                                                       | 5 years          | SN only stimulated intra-operatively                                                                                                                                                                                                                                                                                                          |
| Vesper et al. 2007           | 1  | Myoclonic epilepsy                                              | Seizure                | Bilateral STN/SN                                                                                                              | 130-160 Hz, 90 $\mu$ s, 2.3-3.0 V                                            | 12 months        | Seizure intensity/frequency reduced by 50%; generalized tonic-clonic seizure frequency decreased from 1-2/month to 0/month; patient no longer confined to wheelchair                                                                                                                                                                          |
| Broggi et al. 2006           | 1  | Epilepsy (post-traumatic drug resistant partial motor seizures) | Seizure                | Posteromedial SN                                                                                                              | N/A                                                                          | 15 months        | 60% reduction of seizures                                                                                                                                                                                                                                                                                                                     |
| Ulla et al. 2006             | 1  | PD                                                              | Motor                  | Bilateral STN/SN                                                                                                              | SN: 130 Hz, 60 $\mu$ s, 2.2 V<br>STN: 130 Hz, 60 $\mu$ s, 2.5 V              | 3 months         | Bilateral STN-DBS: 46% UPDRS-III improvement and eventual dysarthria; bilateral SN-DBS (most ventral contacts): 12% UPDRS-III improvement and acute mood changes                                                                                                                                                                              |
| Kulisevsky et al. 2002       | 3  | PD                                                              | Motor                  | Bilateral STN/SN pars reticulata                                                                                              | 130 Hz, 60 $\mu$ s, 2-3 V                                                    | 1 week           | Stimulation-induced mania in all patients occurred with stimulation through the most ventral contacts (positioned in SN); resolved when stimulation switched to more dorsal contacts 9-12 days post-surgery; improvement in UPDRS-III score (mean 51%), fluctuation score (70%), and dyskinesia score (mean 50%) noted at 1 week post-surgery |
| Bejjani et al. 1999          | 1  | PD                                                              | Motor                  | Bilateral SN pars compacta and pars reticulata (STN was intended target) - only L side stimulated SN at most ventral contacts | 130 Hz, 60 $\mu$ s, 2.4 V (L SN contact)                                     | 1 month          | SN only stimulated acutely; mood and PET results reported                                                                                                                                                                                                                                                                                     |
| <b>RED NUCLEUS (RN)</b>      |    |                                                                 |                        |                                                                                                                               |                                                                              |                  |                                                                                                                                                                                                                                                                                                                                               |
| Lefranc et al. 2014          | 1  | Cerebellar tremor                                               | Tremor                 | L RN                                                                                                                          | 20/60/130 Hz, 2-7 mA                                                         | Not internalized | Disappearance of postural tremor during insertion and immediately following stimulation onset; no improvement in postural/intentional tremor with subsequent stimulation                                                                                                                                                                      |
| Bejjani et al. 2002          | 4  | PD                                                              | Tremor                 | White matter between the RN and SN                                                                                            | 130 Hz, 60 $\mu$ s, 1-2 V                                                    | 1 month          | N/A                                                                                                                                                                                                                                                                                                                                           |
| Feinstein et al. 1989        | 1  | Cerebral palsy                                                  | Spasticity             | L LC & L dentate nucleus & R RN                                                                                               | 60 Hz, 120 $\mu$ s, 0.2 mA                                                   | N/A              | N/A                                                                                                                                                                                                                                                                                                                                           |

| VENTRAL TEGMENTAL AREA (VTA)/POSTERIOR HYPOTHALAMUS (pHypo) |                          |                 |                                           |                                      |                                                                                                         |              |                                                                                                                                                                                                                                                                                                                                           |
|-------------------------------------------------------------|--------------------------|-----------------|-------------------------------------------|--------------------------------------|---------------------------------------------------------------------------------------------------------|--------------|-------------------------------------------------------------------------------------------------------------------------------------------------------------------------------------------------------------------------------------------------------------------------------------------------------------------------------------------|
| Akram et al. 2017                                           | 7                        | Headache        | CH                                        | Unilateral VTA, Bilateral VTA        | N/A                                                                                                     | 33 months    | 6 patients were responders                                                                                                                                                                                                                                                                                                                |
| Akram et al. 2016                                           | 21                       | Headache        | CH                                        | Unilateral VTA                       | 185 Hz, 60 $\mu$ s                                                                                      | 18 months    | 60% overall improvement in median headache frequency; decreased headache impact test score                                                                                                                                                                                                                                                |
| Leone et al. 2013                                           | 19                       | Headache        | CH                                        | Unilateral pHypo, Bilateral pHypo    | 180 Hz, 60 $\mu$ s, <7 V                                                                                | 6-11 years   | 12 patients almost (<1 attack every 3 months) or completely pain-free at last follow-up; several pain-free patients no longer had active stimulation                                                                                                                                                                                      |
|                                                             | 8                        | Headache        | CH                                        | L pHypo                              | 180 Hz, 60 $\mu$ s, 2.6-4.5 V or stimulation off at last follow-up (n=4)                                | 6-11 years   | 5 patients almost or completely pain-free; 2 had relief with recurrence in periods; 1 had no benefit                                                                                                                                                                                                                                      |
|                                                             | 6                        | Headache        | CH                                        | R pHypo                              | 180 Hz, 60 $\mu$ s, 2-4.6 V or stimulation off at last follow-up (n=1)                                  | 8-10 years   | 2 patients almost or completely pain-free; 2 had partial benefits with some tolerance/recurrence; 2 had regular recurrent attacks                                                                                                                                                                                                         |
|                                                             | 4                        | Headache        | CH                                        | Bilateral pHypo                      | R: 180 Hz, 60 $\mu$ s, 1-1.6 V, L: 180 Hz, 60 $\mu$ s, 3.5 V or stimulation off at last follow-up (n=2) | 6-11 years   | 1 patient had reduced attack frequency/intensity; 1 pain-free with recurrence in periods; 2 developed tolerance and had sporadic attacks                                                                                                                                                                                                  |
|                                                             | 1                        | Headache        | CH                                        | N/A                                  |                                                                                                         |              |                                                                                                                                                                                                                                                                                                                                           |
| Fontaine et al. 2010a                                       | 10                       | Headache        | CH                                        | Unilateral retro-hypothalamic region | 186-195 Hz, 60 $\mu$ s                                                                                  | 1 year       | 5 patients considered responders (>50% in weekly attack frequency), 3 patients had some improvement, 2 patients worsened                                                                                                                                                                                                                  |
|                                                             | 5                        | Headache        | CH                                        | L retro-hypothalamic region          | 186-195 Hz, 60 $\mu$ s, 1.5-2.5 V                                                                       | 1 year       | 3 patients had >75% reduction in attack frequency, 1 had 25-50% reduction, 1 worsened                                                                                                                                                                                                                                                     |
|                                                             | 5                        | Headache        | CH                                        | R retro-hypothalamic region          | 187-194 Hz, 60 $\mu$ s, 2-2.8 V                                                                         | 1 year       | 1 patient had >75% reduction in attack frequency, 1 had 50-75% reduction, 2 had <25% reduction, 1 worsened                                                                                                                                                                                                                                |
| Fontaine et al. 2010b                                       | 11                       | Headache        | CH                                        | Unilateral pHypo                     | 185 Hz, 60 $\mu$ s, 1.0-2.8 V                                                                           | 1-11 years   | No significant difference in weekly CH attack frequency between stimulation-ON and OFF periods while randomized; weekly attack frequency decreased by 48.4% during open-label period                                                                                                                                                      |
| Walcott et al. 2009                                         | 1                        | Headache        | CH                                        | R pHypo                              | 185 Hz, 60 $\mu$ s, 1.5 V                                                                               | 27 months    | Resolution of facial pain and recurrence when stimulation turned off in blinded fashion                                                                                                                                                                                                                                                   |
| Bartsch et al. 2008                                         | 6                        | Headache        | CH                                        | L pHypo                              | 130-180 Hz, 3.5-5.5 V                                                                                   | 9-24 months  | 30-90% reduction in pain intensity; 3 patients experienced profound decrease in attack frequency (~1 attack per month) and >70% pain reduction during recurring attacks, 1 patient had no attacks for 6 months but subsequently had recurrent attacks (4-6 per day), 2 still experienced 60-70 attacks per month with <30% pain reduction |
| Franzini et al. 2008a                                       | 17                       | Pain & headache | Various                                   | pHyp                                 | Various settings                                                                                        | 4-62 months  | All MS trigeminal neuralgia patients improved; no patients with neuropathic/atypical facial pain had reduced pain                                                                                                                                                                                                                         |
|                                                             | N/A                      | Headache        | CH                                        | Unilateral pHyp                      | 50 Hz, 90 $\mu$ s, 0.6-3.3 V                                                                            | 12-62 months | Reported on in <b>Franzini et al. 2007</b>                                                                                                                                                                                                                                                                                                |
|                                                             | 3                        | Pain            | Neuropathic pain and atypical facial pain | pHyp                                 | 180 Hz, mean: 1.3 V                                                                                     | 4 months     | No reduction in pain                                                                                                                                                                                                                                                                                                                      |
|                                                             | 5                        | Pain            | MS trigeminal neuralgia                   | pHyp                                 | N/A                                                                                                     | 1-3 years    | 2 patients pain-free; 3 patients had reduced pain but still required analgesic medication                                                                                                                                                                                                                                                 |
| Pinsker et al. 2008                                         | 2                        | Headache        | CH                                        | Unilateral hypo                      | 180-185 Hz, 60 $\mu$ s, 2.5-5.5 V                                                                       | 3-12 months  | Insufficient pain reduction                                                                                                                                                                                                                                                                                                               |
|                                                             |                          | Headache        | CH                                        | L pHypo                              | 180 Hz, 60 $\mu$ s, 5.5 V                                                                               | 12 months    | Insufficient pain reduction                                                                                                                                                                                                                                                                                                               |
|                                                             |                          | Headache        | CH                                        | L pHypo                              | 185 Hz, 60 $\mu$ s, 2.5V                                                                                | 3 months     | Insufficient pain reduction                                                                                                                                                                                                                                                                                                               |
| Franzini et al. 2008b                                       | 2 (2 others with ZI-DBS) | Epilepsy        | Various                                   | Bilateral VTA                        | 180 Hz, 90 $\mu$ s, 1.5-3.5 V                                                                           | 5-9 years    | 75-80% seizure reduction                                                                                                                                                                                                                                                                                                                  |

|                      |                                                                  |                       |                      |                                                |                                                                    |                                    |                                                                                                                                                                                                                                                                                                         |
|----------------------|------------------------------------------------------------------|-----------------------|----------------------|------------------------------------------------|--------------------------------------------------------------------|------------------------------------|---------------------------------------------------------------------------------------------------------------------------------------------------------------------------------------------------------------------------------------------------------------------------------------------------------|
|                      |                                                                  | Epilepsy              | Post-anoxia          | Bilateral VTA                                  | 180 Hz, 90 $\mu$ s, 1.5 V                                          | 5 years                            | 75% seizure reduction rate                                                                                                                                                                                                                                                                              |
|                      |                                                                  | Epilepsy              | Idiopathic           | Bilateral VTA                                  | 185 Hz, 90 $\mu$ s, 3.5 V                                          | 9 years                            | 80% seizure reduction rate                                                                                                                                                                                                                                                                              |
| Franzini et al. 2007 | 22                                                               | Various               | Various              | pHypo                                          | 180 Hz, 60 $\mu$ s, 0.6-3.3 V                                      | 1-52 months                        | Good pain relief for headache; poor pain relief for atypical facial pain; reduced seizures and improved behaviour in autism patient                                                                                                                                                                     |
|                      | 16                                                               | Headache              | CH                   | Bilateral pHypo (n=2); unilateral pHypo (n=14) | 180 Hz, 60 $\mu$ s, 0.6-3.3 V                                      | 1-52 months                        | All patients achieved pain relief (71% of days were pain-free); duration of attacks significantly reduced                                                                                                                                                                                               |
|                      | 1                                                                | Headache              | SUNCT                | Unilateral pHypo                               | 180 Hz, 60 $\mu$ s, 0.9-1.8 V                                      | 15 months                          | Pain reduction with sporadic attacks                                                                                                                                                                                                                                                                    |
|                      | 3                                                                | Pain                  | Atypical facial pain | Unilateral pHypo                               | 180 Hz, 60 $\mu$ s, 0.9-1.8 V                                      | 6-10 months                        | No pain reduction                                                                                                                                                                                                                                                                                       |
|                      | 2                                                                | Disruptive behaviour  | Autism               | pHypo                                          | 180 Hz, 60 $\mu$ s, 1 V                                            | 15-18 months                       | Improvement of disruptive behaviour and reduction in seizure rate                                                                                                                                                                                                                                       |
| Starr et al. 2007    | 4                                                                | Headache              | CH                   | Unilateral pHypo                               | 185-Hz, 60 $\mu$ s, 1-3 V                                          | 12-15 months                       | 2 patients had >50% reduction in pain, 1 had <50% reduction in pain, 1 had transient complete suppression of headache but not persistent improvement                                                                                                                                                    |
| Vetrugno et al, 2007 | 3                                                                | Headache, sleep apnea | CH                   | Unilateral pHypo                               | NA                                                                 | 4 months                           | Abolition of nocturnal CH attacks; improved sleep efficiency                                                                                                                                                                                                                                            |
| Cortelli et al, 2007 | 8                                                                | Headache              | CH                   | Unilateral pHypo                               | 130-180 Hz, 60-90 $\mu$ s, 1.3-2.8 V                               | N/A                                | 6 patients pain-free state without drugs; the remaining 2 patients required low dose verapamil prophylaxis                                                                                                                                                                                              |
| Owen et al, 2007a    | 1                                                                | Headache              | CH                   | Unilateral pHypo                               | 180 Hz, 90 $\mu$ s                                                 | 8 months                           | No CH attacks following implantation                                                                                                                                                                                                                                                                    |
| Leone et al, 2006b   | 16                                                               | Headache              | CH                   | Unilateral pHypo                               | 180 Hz, 60 $\mu$ s                                                 | N/A                                | Acute response to stimulation reported                                                                                                                                                                                                                                                                  |
| Leone et al, 2006a   | 16                                                               | Headache              | CH                   | pHypo                                          | 180 Hz, 60 $\mu$ s, <7 V                                           | 1-52 months                        | 10 patients pain-free                                                                                                                                                                                                                                                                                   |
|                      | 2                                                                | Headache              | CH                   | Bilateral pHypo                                | L: 180 Hz, 60 $\mu$ s, 2.4-3.2 V<br>R: 180 Hz, 60 $\mu$ s, 2.8-3 V | L: 25-52 months<br>R: 21-41 months | Pain-free (n=1), sporadic attacks (n=1)                                                                                                                                                                                                                                                                 |
|                      | 14                                                               | Headache              | CH                   | Unilateral pHypo                               | 180 Hz, 60 $\mu$ s, 0.6-3.3 V                                      | 1-47 months                        | Pain-free (n=9), sporadic attacks (n=2), 1 attack every 2 days (n=1), 1 attack per day (n=2)                                                                                                                                                                                                            |
| Schoenen et al, 2005 | 4 (2 others not implanted/died of intra-operative complications) | Headache              | CH                   | Unilateral pHypo                               | 185 Hz, 60-90 $\mu$ s, 2-4.5 V                                     | 12-17 months                       | Excellent pain relief in 3 patients; unsatisfactory relief in 1 patient                                                                                                                                                                                                                                 |
|                      | 3                                                                | Headache              | CH                   | L pHypo                                        | 185 Hz, 90 $\mu$ s, 2-4.5 V                                        | 17 months                          | 1 patient unstable for 7 months, then pain-free for 5 months with recent relapse at last follow-up; 1 patient had relief for 8 months and was pain-free for 5 months before last follow-up; 1 patient had relief for 8 months followed by relapse, then relief again for 4 months before last follow-up |
|                      | 1                                                                | Headache              | CH                   | R pHypo                                        | 185 Hz, 60 $\mu$ s, 3.3 V                                          | 12 months                          | Pain-free for 9 months followed by relapse; pain-free again fore 3 months before last follow-up                                                                                                                                                                                                         |
| Leone et al, 2005    | 1                                                                | Headache              | SUNCT                | L pHypo                                        | 180 Hz, 60 $\mu$ s, 0.9-1.8 V                                      | 15 months                          | Pain reduction after 1 month of stimulation; tolerance to stimulation occurred but increasing amplitude reduced pain                                                                                                                                                                                    |
| Leone et al, 2004    | 1                                                                | Headache              | CH                   | Bilateral pHypo                                | Unspecified                                                        | 3 years                            | Long-lasting pain relief without the need for pharmaceutical prophylaxis and without major side effects.                                                                                                                                                                                                |
| Franzini et al. 2003 | 5                                                                | Headache              | CH                   | Bilateral, unilateral pHypo                    | 180 Hz, 60 $\mu$ s, 0.7-3 V                                        | 2-18 months                        | All patients benefited from complete pain control within 4 months of starting DBS                                                                                                                                                                                                                       |
|                      | 1                                                                | Headache              | CH                   | Bilateral pHypo                                | Unspecified                                                        | R: 22 months<br>L: 12 months       | R: complete pain control after 1 month;<br>L: immediate pain control                                                                                                                                                                                                                                    |
|                      | 3                                                                | Headache              | CH                   | L pHypo                                        | Unspecified                                                        | 2-18 months                        | Complete pain control after 2 months (n=2); complete pain control after 48 hours (n=1)                                                                                                                                                                                                                  |

|                                                                                                                                                                |                                                                         |                                                          |                             |                                                                                                   |                                                                                             |                                                                 |                                                                                                                                                                                                                                                                                                                                                      |
|----------------------------------------------------------------------------------------------------------------------------------------------------------------|-------------------------------------------------------------------------|----------------------------------------------------------|-----------------------------|---------------------------------------------------------------------------------------------------|---------------------------------------------------------------------------------------------|-----------------------------------------------------------------|------------------------------------------------------------------------------------------------------------------------------------------------------------------------------------------------------------------------------------------------------------------------------------------------------------------------------------------------------|
|                                                                                                                                                                | 1                                                                       | Headache                                                 | CH                          | R pHypo                                                                                           | Unspecified                                                                                 | 7 months                                                        | Complete pain control after 4 months                                                                                                                                                                                                                                                                                                                 |
| Leone et al. 2001                                                                                                                                              | 1                                                                       | Headache                                                 | CH                          | L pHypo                                                                                           | 180 Hz, 60 $\mu$ s, 3 V                                                                     | 13 months                                                       | Pain free under continuous stimulation; pain recurred within 48 hours of stimulation cessation                                                                                                                                                                                                                                                       |
| <b>MEDIAL FOREBRAIN BUNDLE (MFB)</b>                                                                                                                           |                                                                         |                                                          |                             |                                                                                                   |                                                                                             |                                                                 |                                                                                                                                                                                                                                                                                                                                                      |
| Coenen et al. 2019a                                                                                                                                            | 24                                                                      | Uniplar depression, bipolar depression                   | TRD                         | Bilateral sLMFB                                                                                   | 130 Hz, 60 $\mu$ s, 3 mA                                                                    | N/A                                                             | Clinical outcomes reported in <b>Schlaepfer et al. 2013 &amp; Coenen et al. 2019</b> ; L fronto-polar/orbitofrontal volume found to differentiate responders from non-responders on pre-op MRI                                                                                                                                                       |
| Coenen et al. 2019b                                                                                                                                            | 16                                                                      | Unipolar depression (n=15), bipolar depression (n=1)     | TRD                         | Bilateral sLMFB                                                                                   | 131 Hz, 60 $\mu$ s, 3 mA                                                                    | 12 months                                                       | 50% of patients considered remitters (MADRS<10); significant overall MADRS, HAMD, QoL improvement compared to baseline; no difference in cognitive domains compared to baseline                                                                                                                                                                      |
| Fenoy et al. 2018                                                                                                                                              | 6                                                                       | Unipolar depression                                      | TRD                         | Bilateral sLMFB                                                                                   | 130 Hz, 60 $\mu$ s, 3-4 V                                                                   | 12 months (n=5); 1 week (n=1, drop-out)                         | 4 patients considered remitters (HAM-D<7) and responders ( $\geq$ 50% MADRS reduction) at 12 months, 1 considered non-responder, 1 dropped out; improvements from baseline observed at short-term (1 week; MADRS: 15-77%, CGI: 0-66%, HAM-A: -50-65%) and long-term (12 months; MADRS: 21-100%, CGI: 0-80%, HAM-A: 33-94%, HAM-D: 16-100%) follow-up |
| Blomstedt et al. 2017                                                                                                                                          | 1                                                                       | Unipolar depression, anorexia nervosa                    | TRD                         | Bilateral MFB (bilateral electrodes implanted in bed nucleus of stria terminalis 24 months later) | 130 Hz, 120 $\mu$ s, ~3 V bipolar (initially) and 4.3V monopolar (after electrode revision) | 24 months                                                       | 37% MADRS reduction, 32% HAM-D reduction, 29% HAM-A reduction, 83% GAF improvement, 6% BMI reduction                                                                                                                                                                                                                                                 |
| Bewernick et al. 2017                                                                                                                                          | 8                                                                       | Depression                                               | TRD                         | Bilateral sLMFB                                                                                   | N/A                                                                                         | 12 months (primary outcome); up to 4 years (secondary outcomes) | 6 patients considered responders ( $\geq$ 50% MADRS reduction), 50% considered remitters (MADRS<10) at 12 months post-op; improvements on MADRS, HAM-D, BDI, HAM-A, SF-36, and GAF maintained through long-term follow-up                                                                                                                            |
| Conen et al. 2017                                                                                                                                              | 2                                                                       | OCD                                                      | Compulsive behaviour        | Bilateral sLMFB                                                                                   | 130 Hz, 60 $\mu$ s, 2.5-3.6 mA                                                              | 12 months                                                       | Immediate and long-term improvement in compulsive behaviour; 35% YBOCS reduction in 1 patient, 50% YBOCS reduction in 1 patient at 12 months                                                                                                                                                                                                         |
| Fenoy et al. 2016                                                                                                                                              | 4                                                                       | Unipolar depression                                      | TRD                         | Bilateral sLMFB                                                                                   | 130 Hz, 60 $\mu$ s, 3-4 V                                                                   | 12 months                                                       | <b>See Fenoy et al. 2018</b>                                                                                                                                                                                                                                                                                                                         |
| Schlaepfer et al. 2013                                                                                                                                         | 7                                                                       | Unipolar depression, bipolar depression                  | TRD                         | Bilateral sLMFB                                                                                   | 130 Hz, 60 $\mu$ s, 2.3-4.9 mA                                                              | 12 weeks                                                        | 6 patients considered responders ( $\geq$ 50% MADRS improvement) after 2 days of stimulation; 4 had sustained improvement after 12 weeks                                                                                                                                                                                                             |
| <b>MESENCEPHALIC RETICULAR FORMATION (mRF)</b>                                                                                                                 |                                                                         |                                                          |                             |                                                                                                   |                                                                                             |                                                                 |                                                                                                                                                                                                                                                                                                                                                      |
| Yamamoto et al. 2013; Yamamoto et al. 2010; Yamamoto & Katayama. 2005; Yamamoto et al. 2005; Yamamoto et al. 2002; Katayama et al. 1991; Tsubokawa et al. 1990 | 2 (19 other patients received centromedian parafascicular thalamic DBS) | TBI, Vascular brain injury, Anoxic injury                | Persistent vegetative state | mRF (cuneiform nucleus)                                                                           | 25 Hz                                                                                       | 10+ years                                                       | 8 of 21 patients treated with either mRF-DBS (n=2) or thalamic DBS (n=19) demonstrated improved levels of consciousness/arousal within 4-12 months of DBS onset (becoming able to speak or communicate non-verbally); all patients remained incapable of self-care                                                                                   |
| <b>PERIAQUEDUCTAL GRAY/PERIVENTRICULAR GRAY (PAG/PVG)</b>                                                                                                      |                                                                         |                                                          |                             |                                                                                                   |                                                                                             |                                                                 |                                                                                                                                                                                                                                                                                                                                                      |
| Hollingworth et al. 2017                                                                                                                                       | 3                                                                       | Trigeminal anaesthesia dolorosa, phantom limb pain, CPSP | Neuropathic pain            | R PVG/PAG/CMPf (single electrode, n=2), R                                                         | 10 Hz, 60-110 $\mu$ s, 3.5-4.5 V                                                            | 3 years                                                         | Improvement in pain severity and quality of life in all 3 patients                                                                                                                                                                                                                                                                                   |

|                          |    |                                                                                                                                           |                  | PVG/PAG/CMPf (single electrode) & NAcc (n=1)            |                                                                        |             |                                                                                                                                                                                             |
|--------------------------|----|-------------------------------------------------------------------------------------------------------------------------------------------|------------------|---------------------------------------------------------|------------------------------------------------------------------------|-------------|---------------------------------------------------------------------------------------------------------------------------------------------------------------------------------------------|
|                          | 1  | Trigeminal anaethetia dolorosa                                                                                                            | Neuropathic pain | R PVG/PAG/CMPf                                          | 10 Hz, 60 $\mu$ s, 4.5 V                                               | 3 years     | 89% VAS improvement                                                                                                                                                                         |
|                          | 1  | Phantom limb pain                                                                                                                         | Neuropathic pain | R PVG/PAG/CMPf                                          | 10 Hz, 90 $\mu$ s, 4 V                                                 | 3 years     | 40% VAS improvement                                                                                                                                                                         |
|                          | 1  | CPSP                                                                                                                                      | Neuropathic pain | R PVG/PAG/CMPf & R NAc                                  | 10 Hz, 110 $\mu$ s, 3.5 V                                              | 3 years     | 67% VAS improvement with PVG/PAG/CMPf-DBS; NAcc-DBS unhelpful and not used                                                                                                                  |
| Sim-Williams et al. 2017 | 5  | Anaesthesia dolorosa, phantom limb pain                                                                                                   | Neuropathic pain | Unilateral PAG & CMPf (n=4), unilateral PAG & VPL (n=1) | N/A                                                                    | N/A         | >50% improvement in pain and significant improvement in mood in all patients; acute PET imaging results reported                                                                            |
| Gray et al. 2014         | 18 | Phantom limb pain, CPSP, cephalgia                                                                                                        | Neuropathic pain | PVG/PAG                                                 | 5–50 Hz, 60–450 ms, 0.3–5.8 V                                          | 6–73 months | Stimulation significantly associated with improvement of pain reduction (MPQ), quality of life (SF-36), level of disability, anxiety/depression (HADS), and deterioration of working memory |
| Boccard et al. 2013      | 21 | Phantom limb pain, brachial plexus, CPSP, spine, cephalgia                                                                                | Neuropathic pain | PVG                                                     | 5-50 Hz, 200-450 $\mu$ s, 0.5-5 V, Mean: 22.8 Hz, 193.8 $\mu$ s, 2.3 V | 2-4 years   | Stimulation associated with long-term (>1 year) pain relief (MPQ/VAS), quality of life (SF-36, EQ-5D), and general health state; DBS efficacy varied based on etiology                      |
| Pereira et al. 2013a     | 4  | Various                                                                                                                                   | Neuropathic pain | PVG                                                     | 15-50 Hz, 120-300 $\mu$ s, 1.5-3 V                                     | 1 week      | 28-100% VAS improvement; 250-300% NPS improvement                                                                                                                                           |
|                          |    | Oral pain                                                                                                                                 | Neuropathic pain |                                                         | 50 Hz, 120 $\mu$ s, 2.9 V                                              |             | 28% VAS improvement                                                                                                                                                                         |
|                          |    | Stroke                                                                                                                                    | Neuropathic pain |                                                         | 50 Hz, 250 $\mu$ s, 2.8 V                                              |             | 100% VAS improvement                                                                                                                                                                        |
|                          |    | Phantom limb pain                                                                                                                         | Neuropathic pain |                                                         | 50 Hz, 300 $\mu$ s, 3 V                                                |             | 60% VAS improvement; 250% NPS improvement                                                                                                                                                   |
|                          |    | Failed Back Surgery                                                                                                                       | Neuropathic pain |                                                         | 15 Hz, 210 $\mu$ s, 1.5 V                                              |             | 70% VAS improvement; 300% NPS                                                                                                                                                               |
| Pereira et al. 2013 b    | 5  | Stroke, oral facial pain, head trauma, cerebral arteriovenous malformation, phantom limb                                                  | Neuropathic pain | Unilateral PVG/PAG                                      | 10-80 Hz, 120-450 $\mu$ s, 2-3 V                                       | 1 week      | 4 of 5 patients received beneficial pain relief during externalized trial stimulation                                                                                                       |
| Papuc et al. 2013        | 1  | Ischemic stroke and tremor                                                                                                                | Neuropathic pain | PVG/PAG & VPL                                           | 5-100 Hz, 210 $\mu$ s, 1.5-2.5 V                                       | N/A         | Some pain reduction with PVG/PAG-DBS alone; further relief and significant tremor reduction with combined PVG/PAG and VPL-DBS                                                               |
| Mallory et al. 2012      | 1  | CPSP                                                                                                                                      | Neuropathic pain | NAcc & sensory thalamus & PVG                           | 130 Hz, 90-300 $\mu$ s, 3-3.5 V                                        | 11 months   | No pain relief with thalamic DBS; combined NAcc and PVG-DBS associated with pain reduction without adverse effects                                                                          |
| Green et al. 2012        | 6  | Glossopharyngeal neuralgia, brachial plexus injury, phantom limb pain, CPSP, brachial plexus injury                                       | Neuropathic pain | PAG & VPL (n=5), PAG (n=1)                              | 20-50 Hz, 90-450 $\mu$ s, 0.5-7 V                                      | 9-81 months | No clinical outcome data reported                                                                                                                                                           |
| Hyam et al. 2012a        | 10 | Hemibody pain, trigeminal neuralgia, facial pain, arm pain, phantom limb pain, occipital neuralgia                                        | Pain             | Unilateral PAG                                          | 5-40 Hz, 120-450 $\mu$ s, 0.5-7.3 V                                    | N/A         | Acute lung function testing performed                                                                                                                                                       |
| Patel et al. 2011        | 1  | CPSP                                                                                                                                      | Neuropathic pain | PVG/PAG                                                 | 10 Hz, 210 $\mu$ s, 5.4 V                                              | 33 months   | Refractory hypertension was controlled chronically with PVG stimulation                                                                                                                     |
| Carter et al. 2011       | 1  | Phantom limb pain                                                                                                                         | Neuropathic pain | Unilateral PVG/PAG                                      | 40 Hz, 450 $\mu$ s, 3.1 V                                              | N/A         | No clinical outcome data reported                                                                                                                                                           |
| Green et al. 2010        | 5  | Phantom limb pain, oral/facial pain, CPSP, other etiologies                                                                               | Neuropathic pain | Unilateral PVG/PAG                                      | 10-50 Hz, 20 $\mu$ s, 3-4.5 V                                          | N/A         | No clinical outcome data reported                                                                                                                                                           |
| Pereira et al. 2010a     | 16 | Amputation, cortical stroke, subcortical stroke, brainstem stroke, scalp schwannoma resection, thalamic stroke, brachial plexus avulsion, | Neuropathic pain | Rostral PAG                                             | 5-50 Hz, 60-450 $\mu$ s, 1-5.8 V                                       | N/A         | No clinical outcome data reported                                                                                                                                                           |

|                         |    |                                                                                                                                                                                         |                                                 |                                                                        |                                                                                                       |                              |                                                                                                                                                                                                                                                                                                                                               |
|-------------------------|----|-----------------------------------------------------------------------------------------------------------------------------------------------------------------------------------------|-------------------------------------------------|------------------------------------------------------------------------|-------------------------------------------------------------------------------------------------------|------------------------------|-----------------------------------------------------------------------------------------------------------------------------------------------------------------------------------------------------------------------------------------------------------------------------------------------------------------------------------------------|
|                         |    | malignancy, scalp trauma, spinal cord injury                                                                                                                                            |                                                 |                                                                        |                                                                                                       |                              |                                                                                                                                                                                                                                                                                                                                               |
| Pereira et al. 2010b    | 1  | Facial pain                                                                                                                                                                             | Neuropathic pain                                | PAG & VPM                                                              | 50 Hz, 120 $\mu$ s, 2.9 V                                                                             | 1 year                       | PAG (not VPM) stimulation associated with long-term decrease in mean systolic and diastolic blood pressure (131/85 mmHg ON vs. 144/196 mmHg OFF) and partial pain reduction                                                                                                                                                                   |
| Pickering et al. 2009   | 1  | CPSP                                                                                                                                                                                    | Neuropathic pain                                | PVG                                                                    | 5 Hz, 240 $\mu$ s, 2 V                                                                                | 4 months                     | 40% pain reduction (NPS) that gradually lessened over time                                                                                                                                                                                                                                                                                    |
| Owen et al. 2008        | 4  | Lower leg stump pain, brachial plexus injury, other etiologies causing hemibody pain                                                                                                    | Neuropathic pain                                | Unilateral PVG                                                         | N/A                                                                                                   | 1 week                       | 2 patients experienced complete pain relief, 1 had partial relief (MPQ)                                                                                                                                                                                                                                                                       |
| Owen et al. 2007b       | 1  | Lower leg stump pain                                                                                                                                                                    | Neuropathic pain                                | PVG/PAG                                                                | N/A                                                                                                   | N/A                          | Excellent pain reduction when using the deepest contact                                                                                                                                                                                                                                                                                       |
| Spooner et al. 2007     | 1  | CPSP                                                                                                                                                                                    | Neuropathic pain                                | Unilateral PVG & bilateral cingulate gyrus                             | PVG: 20 Hz (low), 130 Hz (high); cingulate gyrus: 130 Hz                                              | 4 months                     | PVG and cingulate-DBS associated with pain reduction, mood improvement in mood, and reduced lidocaine use                                                                                                                                                                                                                                     |
| Green et al. 2007       | 1  | Oral pain                                                                                                                                                                               | Neuropathic pain                                | PAG & VPM                                                              | 30 Hz, 2 V                                                                                            | N/A                          | PVG stimulation reduce arterial blood pressure and pain. VPM stimulation had no effect on blood pressure, but improved pain relief                                                                                                                                                                                                            |
| Kringelbach et al. 2007 | 1  | phantom limb pain                                                                                                                                                                       | Neuropathic pain                                | PVG/PAG                                                                | 7 Hz, 300 $\mu$ s, 1.5 V                                                                              | N/A                          | 74% pain reduction (MPQ) and corresponding changes in mid-anterior orbitofrontal and subgenual cingulate cortices (magnetoencephalography); pain returned immediately if stimulation interrupted                                                                                                                                              |
| Pereira et al. 2007     | 2  | Various                                                                                                                                                                                 | Neuropathic pain                                | PVG & VPL                                                              | N/A                                                                                                   | 1 year                       | 34-43% VAS reduction; 5-65% MPQ reduction                                                                                                                                                                                                                                                                                                     |
|                         |    | L hemibody pain                                                                                                                                                                         | Neuropathic pain                                | R PVG and R VPL                                                        |                                                                                                       | 1 year                       | 43% VAS reduction; 65% MPQ reduction                                                                                                                                                                                                                                                                                                          |
|                         |    | R arm pain                                                                                                                                                                              | Neuropathic pain                                | L PVG & L VPL                                                          |                                                                                                       | 1 year                       | 34% VAS reduction; 5% MPQ reduction                                                                                                                                                                                                                                                                                                           |
| Owen et al. 2007a       | 47 | Post stroke pain, phantom limb pain, brachial plexus, anaesthesia dolorosa, spinal cord injury, other                                                                                   | Neuropathic pain                                | PVG, PVG & somatosensory thalamus                                      | PVG: 120-450 Hz, 5-30 $\mu$ s, 0.8-4.5 V<br>Somatosensory thalamus: 60-400Hz, 10-50 $\mu$ s, 0.7-4.4V | 1-76 months                  | Of 27 with PVG-DBS or combined PVG and VPL/VPM-DBS not lost to follow-up, 13 had good-to-excellent pain relief ( $\geq$ 50% VAS improvement), 13 had moderate relief (20-50% VAS improvement), 1 had poor relief (<20% VAS improvement); PVG-DBS alone reduced VAS scores by 59% while combined PVG and VPL/VPM-DBS reduced VAS scores by 36% |
| Green et al. 2006b      | 16 | phantom limb pain, thalamic hemorrhage, cortical infarction, post-traumatic head pain, pontine hemorrhage, occipital neuralgia, Post surgical supraorbital pain, brachial plexus injury | Neuropathic pain                                | Unilateral PAG (n=10), unilateral PAG & VPL (n=4), bilateral PAG (n=2) | 5-80 Hz, 120-450 $\mu$ s, 0.5-5 V                                                                     | 1 week (VAS)<br>1 year (MPQ) | Ventral electrodes associated with greater pain reduction (VAS) compared to dorsal electrodes; acute blood pressure changes reported                                                                                                                                                                                                          |
| Green et al. 2006a      | 11 | Thalamic hemorrhage, thalamic infarct, brachial plexus injury, anesthesia dolorosa, postsurgical supraorbital pain, pontine hemorrhage, post-traumatic head pain                        | Neuropathic pain                                | Unilateral PVG (n=8), unilateral PVG & VPL (n=3)                       | 50 Hz, 120 $\mu$ s, <3 V                                                                              | 1 year                       | 4 patients had good-to-excellent pain relief ( $\geq$ 50% VAS improvement), 5 had moderate relief (20-50% VAS improvement), 2 had poor relief (<20% VAS improvement); PVG-DBS alone reduced VAS scores by 53% while combined PVG and VPL/VPM-DBS reduced VAS scores by 26%                                                                    |
| Owen et al. 2006        | 12 | CPSP                                                                                                                                                                                    | Neuropathic pain                                | PVG, PVG & VPL                                                         | N/A                                                                                                   | 27 months                    | Significant reduction in pain overall (48.8% VAS; 38% MCQ); 2 patients had good-to-excellent pain relief ( $\geq$ 50% VAS improvement), 7 had moderate relief (20-50% VAS improvement), 3 had poor relief (<20% VAS improvement)                                                                                                              |
| Rasche et al. 2006      | 55 | Various                                                                                                                                                                                 | Neuropathic pain (n=54), nociceptive pain (n=2) | PVG & VPL                                                              | N/A                                                                                                   | 0.5-8 years                  | 21 patients had good-to-excellent pain relief ( $\geq$ 50% VAS improvement), 5 had moderate relief (25-50% VAS improvement), 29 had poor relief (<25% VAS improvement)                                                                                                                                                                        |



|                               |                                      |                                                                                         |                            |                                                           |                                                        |               |                                                                                                                                      |
|-------------------------------|--------------------------------------|-----------------------------------------------------------------------------------------|----------------------------|-----------------------------------------------------------|--------------------------------------------------------|---------------|--------------------------------------------------------------------------------------------------------------------------------------|
|                               | 13                                   | Failed back surgery syndrome                                                            | Neuropathic pain           | PVG & VPL                                                 |                                                        | 0.5-8 years   | 75-100 pain reduction in 4 patients, 50-75% reduction in 5 patients, 25-50% reduction in 1 patient, no benefit in 3 patients         |
|                               | 6                                    | Complex regional pain syndrome                                                          | Neuropathic pain           | PVG & VPL                                                 |                                                        | 2-8 years     | 75-100% pain reduction in 2 patients, 50-75% reduction in 2 patients, no benefit in 2 patients                                       |
|                               | 6                                    | Dysesthesia dolorosa                                                                    | Neuropathic pain           | PVG & VPM                                                 |                                                        | 0.5-5 years   | 75-100% pain reduction in 2 patients, 50-75% reduction in 1 patient, 25-50% benefit in 1 patient, no benefit in 2 patients           |
|                               | 4                                    | phantom limb pain                                                                       | Neuropathic pain           | PVG & VPL                                                 |                                                        | 0.5-6.5 years | 75-100% pain reduction in 1 patient, 25-50% reduction in 1 patient, no benefit in 2 patients                                         |
|                               | 12                                   | Spinal cord injury                                                                      | Neuropathic pain           | PVG & VPL                                                 |                                                        | 0.5-4 years   | 75-100% pain reduction in 1 patient, 25-50% reduction in 1 patient, 0-25% reduction in 3 patients, no benefit in 7 patients          |
|                               | 11                                   | CPSP                                                                                    | Neuropathic pain           | PVG & VPL                                                 |                                                        | 1-2.5 years   | 50-75% pain reduction in 1 patient, 25-50% reduction in 1 patient, no benefit in 9 patients                                          |
|                               | 1                                    | Postherpetic neuralgia                                                                  | Neuropathic pain           | PVG & VPL                                                 |                                                        | 5.5 years     | 50-75% pain reduction                                                                                                                |
|                               | 2                                    | Coccygodynia, polyarthritits                                                            | Nociceptive pain           | PVG & VPL                                                 |                                                        | 1 year        | 50-75% pain reduction in 1 patient, no benefit in 1 patient                                                                          |
| Hamani et al. 2006            | 8                                    | CPSP (n=3), atypical face pain (n=2), phantom limb pain (n=1), syringomyelia (n=1)      | Neuropathic pain           | Ipsilateral PVG/PAG & VC                                  | VC: 100 Hz, 90 ls, 2.1 V<br>PVG: 100 Hz, 300 ls, 4.1 V | 1 year        | 5 patients had initial benefit with PVG/PAG and VC-DBS and were internalized; only 1 (with syringomyelia) had good long-term benefit |
| Green et al. 2005             | 15                                   | Various                                                                                 | Neuropathic pain           | Unilateral PVG/PAG (n=11), unilateral PVG/PAG & VPL (n=4) | 10 Hz, 120 ms, 4 V                                     | N/A           | Acute blood pressure changes reported                                                                                                |
| Bittar et al. 2005            | 3                                    | phantom limb pain                                                                       | Neuropathic pain           | PVG & VPL (n=2), PVG (n=1)                                | N/A                                                    | 8-20 months   | 55-70% pain reduction (MPQ)                                                                                                          |
| Nandi & Aziz et al. 2004      | 11                                   | NA                                                                                      | Neuropathic pain           | PVG & VPL                                                 | 5-35 Hz                                                | 3-36 months   | Highest pain reduction seen with low frequency stimulation of PVG (5-35Hz), VPL stimulation alone was not to provide pain relief.    |
| Nandi et al. et al. 2003      | 8                                    | Various                                                                                 | Neuropathic pain           | PVG & VPL                                                 | 5-100 Hz                                               |               | Moderate pain relief (20-50% VAS improvement) in 7 patients; 32-46% VAS score reduction overall                                      |
|                               | 1                                    | Multiple Sclerosis                                                                      | Neuropathic pain           | PVG & VPL                                                 |                                                        | 30 months     | 46% pain reduction (VAS)                                                                                                             |
|                               | 1                                    | Trigeminal neuralgia                                                                    | Neuropathic pain           | PVG & VPL                                                 |                                                        | N/A           | N/A (not internalized)                                                                                                               |
|                               | 5                                    | CPSP                                                                                    | Neuropathic pain           | PVG & VPL                                                 |                                                        | 3-12 months   | 32-44% pain reduction (VAS)                                                                                                          |
|                               | 1                                    | Chiari malformation                                                                     | Neuropathic pain           | PVG & VPL                                                 |                                                        | 3 months      | 32% pain reduction (VAS)                                                                                                             |
| Nandi et al. 2002a            | 3 (1 other patient received VPL-DBS) | Various                                                                                 | Neuropathic pain           | PVG & VPL (n=2), PVG (n=1)                                | 25 Hz, 120 $\mu$ s, 2.8 V                              | 6 months      | Moderate pain relief in 1 patient                                                                                                    |
|                               | 2                                    | Hemibody pain                                                                           | Neuropathic pain           | PVG & VPL                                                 | 25 Hz, 120 $\mu$ s, 2.8 V                              | 6 months      | 40% pain reduction (VAS) in 1 patient, no long-term benefit in 1 patient                                                             |
|                               | 1                                    | Face and leg pain                                                                       | Neuropathic pain           | PVG                                                       | N/A                                                    | N/A           | No benefit                                                                                                                           |
| Nandi et al. 2002b            | 2                                    | Trigeminal neuralgia, subarachnoid hemorrhage                                           | Neuropathic pain           | VPL/PVG                                                   | 5-25 Hz                                                | 1 week        | Both patients experienced pain relief (better relief with low frequency stimulation)                                                 |
| Phillips & Bhakta et al. 2000 | 1                                    | CPSP, post-stroke paresis                                                               | Neuropathic pain & paresis | PVG                                                       | 80 Hz, 200 ms, 2 V                                     | 5 months      | Reduced arm/leg pain and improved voluntary movement                                                                                 |
| Rezai et al. 1999             | 3                                    | Traumatic spinal cord injury                                                            | Neuropathic pain           | PVG & thalamus, thalamus                                  | 25 - 50 Hz, 75-100 $\mu$ s, 2 V                        | N/A           | No clinical outcome data reported                                                                                                    |
| Kumar et al. 1997             | 52                                   | Failed back syndrome, peripheral neuropathy or radiculopathy, thalamic pain, trigeminal | Neuropathic pain           | PVG, PVG & thalamus                                       | 25-50 Hz, 0.1-0.5 ms, 1-5 V                            | 6-170 months  | PVG-DBS reduced pain by at least 50% (VAS) in 46 patients                                                                            |

|                                   |    |                                                                                                                                                                                                                                    |                                    |                                                                |                                  |                            |                                                                                                                                                                                  |
|-----------------------------------|----|------------------------------------------------------------------------------------------------------------------------------------------------------------------------------------------------------------------------------------|------------------------------------|----------------------------------------------------------------|----------------------------------|----------------------------|----------------------------------------------------------------------------------------------------------------------------------------------------------------------------------|
|                                   |    | neuropathy, traumatic spinal cord lesions, causalgic pain, phantom limb pain, carcinoma pain                                                                                                                                       |                                    |                                                                |                                  |                            |                                                                                                                                                                                  |
| Vilela Filho et al. 1996          | 11 | CPSP                                                                                                                                                                                                                               | Neuropathic pain                   | PVG & thalamus, PVG & ML                                       | N/A                              | N/A                        | No clinical outcomes reported                                                                                                                                                    |
| Tasker & Vilela Filho et al. 1995 | 25 | Peripheral pain                                                                                                                                                                                                                    | Neuropathic pain                   | PVG                                                            | N/A                              | N/A                        | No effect on pain                                                                                                                                                                |
| Young et al. 1993                 | 9  | Low-back pain, post-fracture thoracic back pain, post-traumatic neck & L arm pain, low back & bilateral leg pain, cervical nerve root injury, CPSP, thalamic pain syndrome, bilateral leg paresthesias & spasms, back & R leg pain | Neuropathic pain                   | R PVG (n=2), L PVG (n=1), R PVG & VPL (n=4), L PVG & VPL (n=2) | 25-120 Hz, 0.1-0.5 $\mu$ s       | N/A                        | Acute pain levels and endogenous opioid levels reported (cerebrospinal fluid analysis)                                                                                           |
| Young et al. 1992                 | 6  | Intractable chronic pain                                                                                                                                                                                                           | Pain Relief                        | Unilateral PBC (n=2), unilateral PBC & PVG/PAG (n=4)           | 50-60 Hz, 100 $\mu$ s, 3-6 V     | 0.5-2 years                | Good-to-excellent pain relief in 3 patients                                                                                                                                      |
|                                   |    | Spinal cord injury                                                                                                                                                                                                                 | Pain relief                        | R PVG & R PBC                                                  |                                  | 2 years                    | Excellent pain relief                                                                                                                                                            |
|                                   |    | Multiple myeloma                                                                                                                                                                                                                   | Pain relief                        | L PVG & L PBC                                                  |                                  | 8 months                   | Good pain relief                                                                                                                                                                 |
|                                   |    | Post-herpetic neuralgia                                                                                                                                                                                                            | Pain relief                        | R PVG & R PBC                                                  |                                  | Electrode not internalized | No pain relief                                                                                                                                                                   |
|                                   |    | Thalamic (central post-stroke) pain                                                                                                                                                                                                | Pain relief                        | L PAG & L PBC                                                  |                                  | 3 months                   | No pain relief                                                                                                                                                                   |
| Kumar et al. 1990                 | 41 | Failed back syndrome, multiple arachnoid cysts, peripheral nerve trauma, sciatic neuropathy, cancer pain, cauda equina syndrome, phantom limb pain                                                                                 | Pain                               | Unilateral PVG                                                 | 25-50 Hz, 0.1-0.5 $\mu$ s, 1-5 V | 0.5-10 years               | Amputation, CPSP, scalp schwannoma resection, thalamic stroke, brachial plexus avulsion, malignancy, scalp trauma, spinal cord injury                                            |
| Young & Chambi et al. 1987        | 45 | Various                                                                                                                                                                                                                            | Neuropathic pain                   | PAG/PVG                                                        | N/A                              | 1 year                     | All patients experienced immediate pain reduction; at 1 year follow-up, 29 had good pain benefit, 4 had partial benefit due to DBS tolerance, 12 had no benefit due to tolerance |
| Hosobuchi et al. 1987             | 7  | Head and neck malignancy                                                                                                                                                                                                           | Chronic intractable pain           | PAG                                                            | 30 Hz, 0.5 ms, 0.5-1.5 mA        | N/A                        | Pain outcomes not reported                                                                                                                                                       |
| Levy et al. 1987                  | 94 | Various                                                                                                                                                                                                                            | Neuropathic pain, nociceptive pain | PAG/PVG & VPL, PAG/PVG                                         | 10 $\pm$ 5 Hz, 20-100 Hz, 1-5 V  | 2-14 years                 | Initial pain relief and hardware internalization in 47 patients; long-term relief in <40% of these internalized patients                                                         |
|                                   | 3  | CPSP                                                                                                                                                                                                                               | Neuropathic pain                   | PAG/PVG                                                        |                                  |                            | No benefit                                                                                                                                                                       |
|                                   | 13 | Peripheral neuropathies                                                                                                                                                                                                            | Neuropathic pain                   | PAG/PVG                                                        |                                  |                            | Initial pain relief/electrode internalization in 5 patients                                                                                                                      |
|                                   | 7  | Facial anesthesia dolorosa                                                                                                                                                                                                         | Neuropathic pain                   | PAG/PVG                                                        |                                  |                            | Initial pain relief/electrode internalization in 2 patients                                                                                                                      |
|                                   | 7  | Paraplegic pain                                                                                                                                                                                                                    | Neuropathic pain                   | PAG/PVG & VPL, PAG/PVG                                         |                                  |                            | Initial pain relief/electrode internalization in 2 patients                                                                                                                      |
|                                   | 2  | Postcordotomy dysesthesia                                                                                                                                                                                                          | Neuropathic pain                   | PAG/PVG & VPL                                                  |                                  |                            | Initial pain relief/electrode internalization in 1 patient                                                                                                                       |
|                                   | 2  | Phantom limb pain                                                                                                                                                                                                                  | Neuropathic pain                   | PAG/PVG & VPL                                                  |                                  |                            | No benefit                                                                                                                                                                       |
|                                   | 4  | Thoracic neuralgias                                                                                                                                                                                                                | Neuropathic pain                   | PAG/PVG                                                        |                                  |                            | Initial pain relief/electrode internalization in 3 patients                                                                                                                      |
|                                   | 4  | Miscellaneous neuropathic pain                                                                                                                                                                                                     | Neuropathic pain                   | PAG/PVG & VPL, PAG/PVG                                         |                                  |                            | Initial pain relief/electrode internalization in 4 patients                                                                                                                      |
|                                   | 47 | Low back and skeletal pain                                                                                                                                                                                                         | Nociceptive pain                   | PAG/PVG & VPL, PAG/PVG                                         |                                  |                            | Initial pain relief/electrode internalization in 28 patients                                                                                                                     |

|                               |                                                       |                                                                                                                                                                                                               |                  |                                                                             |                             |                 |                                                                                                                                                                                          |
|-------------------------------|-------------------------------------------------------|---------------------------------------------------------------------------------------------------------------------------------------------------------------------------------------------------------------|------------------|-----------------------------------------------------------------------------|-----------------------------|-----------------|------------------------------------------------------------------------------------------------------------------------------------------------------------------------------------------|
|                               | 5                                                     | Cancer pain                                                                                                                                                                                                   | Nociceptive pain | PAG/PVG & VPL, PAG/PVG                                                      |                             |                 | Initial pain relief/electrode internalization in 2 patients                                                                                                                              |
| Hosobuchi et al. 1986         | 65                                                    | Herniated lumbar disc, cancer, peripheral neuropathy, cauda equina syndrome, nonmalignant abdominal pain, nonmalignant perineal pain, nonmalignant perineal pain, osteoporosis of spine, atypical facial pain | Neuropathic pain | Bilateral PAG & thalamus (n=36), bilateral PAG (n=29)                       | 20-30 Hz, 2-4 V             | 2-14 years      | 50 patients considered 'successes' (not requiring narcotics for analgesia); 15 considered failures                                                                                       |
| Young & Brechner et al. 1986  | 17                                                    | Malignancy                                                                                                                                                                                                    | Neuropathic pain | R PVG (n=1), bilateral PVG (n=10), L PVG & L VPL (n=3), R PVG & R VPL (n=3) | N/A                         | 1-21 months     | 13 patients achieved virtually total short-term pain relief (no longer requiring narcotic analgesics) and 2 achieved partial short-term relief; 10 patients experienced long-term relief |
| Young et al. 1985             | 42 (6 other patients with somatosensory thalamus-DBS) | Various                                                                                                                                                                                                       | Neuropathic pain | PVG/PAG, PVG/PAG & thalamus, PVG/PAG & internal capsule, thalamus           | N/A                         | 2-60 months     | 15 patients had excellent pain relief, 16 had partial pain relief, 11 had poor pain relief                                                                                               |
|                               | 16                                                    | Failed Back Syndrome                                                                                                                                                                                          | Neuropathic pain | PVG/PAG                                                                     | N/A                         |                 | 9 patients had excellent pain relief, 5 had partial pain relief, 2 had poor pain relief                                                                                                  |
|                               | 7                                                     | Cancer                                                                                                                                                                                                        | Neuropathic pain | PVG/PAG & somatosensory thalamus                                            | N/A                         |                 | 3 patients had excellent pain relief, 3 had partial pain relief, 1 had poor pain relief                                                                                                  |
|                               | 4                                                     | Post-operative pain                                                                                                                                                                                           | Neuropathic pain | PVG/PAG                                                                     | N/A                         |                 | 1 patient had excellent pain relief, 1 had partial pain relief, 2 had poor pain relief                                                                                                   |
|                               | 4                                                     | Anesthesia dolorosa                                                                                                                                                                                           | Neuropathic pain | PVG/PAG                                                                     | N/A                         |                 | 2 patients had partial pain relief, 2 had poor pain relief                                                                                                                               |
|                               | 4                                                     | Brachial plexus avulsion                                                                                                                                                                                      | Neuropathic pain | PVG/PAG & somatosensory thalamus                                            | N/A                         |                 | 2 patients had partial pain relief, 2 had poor pain relief                                                                                                                               |
|                               | 4                                                     | Post-traumatic pain                                                                                                                                                                                           | Neuropathic pain | PVG/PAG & internal capsule                                                  | N/A                         |                 | 2 patients had excellent pain relief, 1 had partial pain relief, 1 had poor pain relief                                                                                                  |
|                               | 2                                                     | Post-herpetic neuralgia                                                                                                                                                                                       | Neuropathic pain | PVG/PAG                                                                     | N/A                         |                 | Partial pain relief                                                                                                                                                                      |
|                               | 1                                                     | Glossodynia                                                                                                                                                                                                   | Neuropathic pain | PVG/PAG & somatosensory thalamus                                            | N/A                         |                 | Poor Pain relief                                                                                                                                                                         |
| Tsubokawa et al. 1985         | 24                                                    | Phantom limb pain, stump pain, myelopathy, postherpetic neuralgia                                                                                                                                             | Neuropathic pain | PAG & somatosensory thalamus                                                | N/A                         | N/A             | Pain relief with PAG-DBS in 3 patients                                                                                                                                                   |
| Roizen et al. 1985            | 33                                                    | N/A                                                                                                                                                                                                           | Neuropathic pain | PAG                                                                         | N/A                         | N/A             | PAG-DBS 1 hour before surgery decreased anaesthetic requirements                                                                                                                         |
| Meyerson et al. 1985          | 6                                                     | N/A                                                                                                                                                                                                           | Neuropathic pain | PVG                                                                         | N/A                         | N/A             | Concentration of substance-P-like immunoreactivity increased in lumbar CSF following stimulation (cerebrospinal fluid analysis)                                                          |
| Tsubokawa et al. 1984         | 1 (13 other patients with VPL DBS)                    | Rectal cancer (all patients had pain due to malignancy)                                                                                                                                                       | Pain             | PAG                                                                         | N/A                         | 2 months        | Somatic pain relief in 10 patients                                                                                                                                                       |
| Dionne et al. 1984            | 12                                                    | N/A                                                                                                                                                                                                           | Neuropathic pain | PVG                                                                         | N/A                         | Intra-operative | Increased levels of beta-endorphin not directly associated with pain relief                                                                                                              |
| Hosobuchi et al. 1983         | 11                                                    | Back surgery, retroperitoneal schwannoma, injury                                                                                                                                                              | neuropathic pain | L PVG & somatosensory thalamus                                              | NA                          | 12-36 months    | All patients had some pain relief (in 2 pain components); 4 patients experienced moderate headache, PVG-DBS became less effective after 12-18 months in 2 patients                       |
| Boivie & Meyerson et al. 1982 | 5                                                     | Pelvic malignancy                                                                                                                                                                                             | Pain             | Unilateral PAG                                                              | 30 Hz, 0.2 msec, 0.2-0.4 mA | N/A             | Pain relief in 3 patients                                                                                                                                                                |
| Richardson et al. 1982        | 9                                                     | CPSP, deafferentation pain, chest wall pain, failed back syndromes                                                                                                                                            | Pain             | PVG/PAG                                                                     | N/A                         | N/A             | Significant pain relief in 4 patients                                                                                                                                                    |
| Dieckmann and                 | 46                                                    | Brachial plexus avulsion, phantom limb                                                                                                                                                                        | Neuropathic pain | PVG, VPM/VPL                                                                | 30-60 Hz                    | up to 4.5 years | Long-term improvement in pain in 32 patients                                                                                                                                             |

|                                       |    |                                                                                                                                                                                                 |                          |                                                             |                                                   |             |                                                                                                                                                                                                                                   |
|---------------------------------------|----|-------------------------------------------------------------------------------------------------------------------------------------------------------------------------------------------------|--------------------------|-------------------------------------------------------------|---------------------------------------------------|-------------|-----------------------------------------------------------------------------------------------------------------------------------------------------------------------------------------------------------------------------------|
| Witzmann et al. 1982                  |    | pain, anaesthesia dolorosa, thalamic pain, post-herpetic neuralgia, postcordotomy dysesthesia                                                                                                   |                          |                                                             |                                                   |             |                                                                                                                                                                                                                                   |
| Plotkin et al. 1982                   | 48 | Carcinoma lung, cervical spondylosis, sciatic nerve entrapment, non-united fracture femur, paraparesis, quadriparesis, diffuse disc disease, stump pain, osteoporosis, failed low back syndrome | Chronic intractable pain | PVG                                                         | N/A                                               | 4-18 months | 38 patients became pain-free or experienced substantial pain relief                                                                                                                                                               |
| Hosobuschi et al. 1979                | 6  | Postcordotomy dysesthesia, thalamic syndrome, lumbosacroarachnoiditis, carcinoma of rectum, carcinoma of colon                                                                                  | Pain                     | PAG, posterior limb of the internal capsule                 | N/A                                               | N/A         | PAG stimulation associated with significant increase in intraventricular beta-endorphin                                                                                                                                           |
| Akil et al. 1978                      | 8  | N/A                                                                                                                                                                                             | Pain                     | PVG                                                         | N/A                                               | N/A         | Increase of enkephalin-like activity upon stimulation                                                                                                                                                                             |
| Richardson & Akil et al. 1977a        | 4  | Various                                                                                                                                                                                         | Neuropathic pain         | PAG                                                         | 25-75 Hz, 3.5-5 V                                 | N/A         | Good-to-excellent pain relief in 3 patients                                                                                                                                                                                       |
|                                       |    | Amputation procedure                                                                                                                                                                            | Neuropathic pain         | Anterior PAG                                                | 25-75 Hz, 0-5 V                                   | N/A         | Good-to-excellent pain relief                                                                                                                                                                                                     |
|                                       |    | Carcinoma of breast                                                                                                                                                                             | Neuropathic pain         | Posterior PAG                                               | 50-75 Hz, 3.5V                                    | N/A         | Good-to-very good pain relief                                                                                                                                                                                                     |
|                                       |    | Carcinoma of L ureter and kidney                                                                                                                                                                | Neuropathic pain         | Posterior PAG                                               | 75 Hz, <2 V                                       | N/A         | Small degree of pain relief                                                                                                                                                                                                       |
|                                       |    | Post-stroke tremor                                                                                                                                                                              | Neuropathic pain         | Rostral PAG                                                 | 75 Hz, 4-5 V                                      | N/A         | Very good pain relief                                                                                                                                                                                                             |
| Richardson & Akil et al. 1977b        | 8  | Various                                                                                                                                                                                         | Neuropathic pain         | Bilateral PVG (n=4), unilateral PVG (n=4)                   | 10-25 Hz, 0.6-1 V                                 | N/A         | 6 patients experienced good-to-excellent pain relief                                                                                                                                                                              |
|                                       | 4  | Lumbar disc disease, malignancy, brachial plexus injury                                                                                                                                         | Neuropathic pain         | Bilateral PVG                                               | 10-25 Hz, 0.2 ms, 1V                              | N/A         | Good to excellent pain relief                                                                                                                                                                                                     |
|                                       | 4  | Vertebral disc disease                                                                                                                                                                          | Neuropathic pain         | Unilateral PVG                                              | N/A                                               | N/A         | 2 with poor pain relief, 2 with good pain relief                                                                                                                                                                                  |
| Hosobuschi et al. 1977                | 6  | Carcinoma of larynx, carcinoma of rectum, carcinoma of colon, diabetic neuropathy, sacral cordoma, anaesthesia dolorosa                                                                         | Neuropathic pain         | L PVG, bilateral PVG                                        |                                                   | 5-18 months | Complete pain reduction in 5 patients                                                                                                                                                                                             |
| <b>PEDUNCULOPONTINE NUCLEUS (PPN)</b> |    |                                                                                                                                                                                                 |                          |                                                             |                                                   |             |                                                                                                                                                                                                                                   |
| Goetz et al. 2019                     | 11 | PD                                                                                                                                                                                              | Axial disability         | Bilateral PPN & STN (n=7), bilateral PPN(n=4)               | 10-30 Hz, 0.8-3.8 V                               | 2 years     | Significant composite gait score improvement (UPDRS-derived) versus baseline (OFF-med); 58% freezing of gait duration reduction at 12 months, 57% reduction at 24 months (OFF-med)                                                |
|                                       | 7  | PD                                                                                                                                                                                              | Axial disability         | Bilateral PPN & STN                                         | R: 25 Hz, 1.4-3.8 V<br>L: 25 Hz, 1.2-3.3 V        |             | 4 good responders, 1 mild responder, 2 bad responders                                                                                                                                                                             |
|                                       | 4  | PD                                                                                                                                                                                              | Axial disability         | Bilateral PPN                                               | R: 25 Hz, 0.8-2 V<br>L: 25Hz, 0.81-1.5 V          |             | 2 good responders, 1 excluded due to protocol noncompliance, 1 excluded due to severe backward fall                                                                                                                               |
| Strumpf et al. 2016                   | 6  | PD                                                                                                                                                                                              | Axial disability         | Bilateral STN & PPN (n=3), bilateral PPN (n=2), R PPN (n=1) | 8-20 Hz (LFS)/60 Hz (HFS)<br>60 µs, 1-2.5 V       | 3-13 months | In 5 patients, greater difference in visual signal required to discern a difference under low frequency conditions versus high frequency or no stimulation conditions                                                             |
| Mestre et al. 2016                    | 9  | PD                                                                                                                                                                                              | Axial disability         | Unilateral PPN                                              | 5-130 Hz; 60-120 µs; 1.9 V (range from 0.7-3.8 V) | 4 years     | At 2 years, patient-reported freezing (UPDRS part II, off-time) was significantly better when compared with baseline with 62.5% of responders; at 4 years, there was no significant change in gait-related items of UPDRS part II |

|                       |    |                      |                  |                                                       |                                                                        |                                               |                                                                                                                                                                                                                                                                                                                |
|-----------------------|----|----------------------|------------------|-------------------------------------------------------|------------------------------------------------------------------------|-----------------------------------------------|----------------------------------------------------------------------------------------------------------------------------------------------------------------------------------------------------------------------------------------------------------------------------------------------------------------|
| Yousif et al. 2016    | 4  | PD                   | Axial disability | Bilateral STN & PPN                                   | 20-30Hz, 0.6-1.8V                                                      | N/A                                           | Lowered vestibular perceptual thresholds with PPN-ON versus PPN-OFF                                                                                                                                                                                                                                            |
| Nosko et al. 2015     | 11 | PD                   | Axial disability | Bilateral STN & PPN, Bilateral PPN                    | N/A                                                                    | 1 year                                        | Compared with 60–80 Hz, 10–25 Hz PPNa stimulation led to decreased akinesia, gait difficulties, daytime sleepiness in 7 patients                                                                                                                                                                               |
| Ricciardi et al. 2015 | 1  | PD (& Pisa Syndrome) | Axial disability | Unilateral PPN                                        | 30 Hz, 60 $\mu$ s, 2 V (bipolar stimulation)                           | 4 years                                       | Gradual worsening of full UPDRS-III and subscores 27-30 over time despite PPN-DBS; general cognitive worsening (especially short-term memory, semantic verbal fluency, object naming) observed after PPN-DBS switched OFF and reversed over 2 months following switching stimulation back ON                   |
| Welter et al. 2015    | 6  | PD                   | Axial disability | Bilateral PPN                                         | Unspecified                                                            | 4-6 months                                    | Significant decrease in freezing episodes in 4 patients, reduced falls in 3 patients, and significantly improved quality of life with PPN-DBS                                                                                                                                                                  |
| Mazzone et al. 2014   | 10 | PD                   | Axial disability | R PPTg (n=9), L PPTg (n=1)                            | 40 Hz, 60 $\mu$ s, 2.5-3.0 V                                           | 1 year                                        | 47% UPDRS-III items 27-30 improvement (med-ON); lower doses of L-dopa required; improved gait initiation, cadence, stride length, left pelvic tilt range of motion, and backward shift of centre of pressure on gait analysis                                                                                  |
| Mazzone et al. 2013   | 26 | PD (22)<br>PSP (4)   | Axial disability | Bilateral PPTg (n=6)<br>L PPTg (n=1)<br>R PPTg (n=20) | 25 Hz (n=6)/40 Hz (n=20), 60 $\mu$ s, 4.3-6.9 V (PSP)/2.1-4.5 V (PD)   | 1 month                                       | 59% UPDRS-III improvement with PPTg-DBS versus DBS-OFF (OFF-med); 44% items 27-30 improvement (OFF-med); 41% Hoehn % Yahr improvement                                                                                                                                                                          |
| Shih et al. 2013      |    | Pisa Syndrome        | Axial disability | L PPN                                                 | 130Hz, 90 $\mu$ s, 1.5V                                                | 14 months                                     | Improvement in axial lean with a reduction in falls                                                                                                                                                                                                                                                            |
| Schrader et al. 2013  | 1  | PD                   | Axial disability | Bilateral GPi & PPN                                   | PPN: 25 Hz, 60 $\mu$ s, 2.5 V<br>GPi: 130 Hz, 210 $\mu$ s, 3 V         | 4 weeks                                       | Combined GPi and PPN-DBS markedly improved freezing of gait, gait ignition, and unsteadiness; GPi-DBS or PPN-DBS alone had a mild effect                                                                                                                                                                       |
| Hazrati et al. 2012   | 2  | PSP                  | Axial disability | Unilateral PPN                                        |                                                                        | 3 months<br>6 months                          | Minor UPDRS-III improvement versus DBS-OFF, mild PSPRS improvement in 1 patient                                                                                                                                                                                                                                |
|                       |    | PSP                  | Axial disability | R PPN                                                 | 20 Hz, 60 $\mu$ s, 3.0 V                                               | 3 months                                      | 11% UPDRS-III and 6% PSPRS improvement versus DBS-OFF                                                                                                                                                                                                                                                          |
|                       |    | PSP                  | Axial disability | L PPN                                                 | 20 Hz, 60 $\mu$ s, 1.8 V                                               | 6 months                                      | 5% UPDRS-III improvement, no PSPRS improvement versus DBS-OFF                                                                                                                                                                                                                                                  |
| Jenkinson et al. 2012 | 2  | PD                   | Axial disability | Bilateral PPN                                         | 20 Hz, 60-90 $\mu$ s, 2.5 V                                            | N/A                                           | 25-30% UPDRS-III items 27-30 improvement; decreased fall frequency; acute eye movements recorded                                                                                                                                                                                                               |
| Khan et al. 2012b     | 4  | PD                   | Axial disability | Bilateral PPN/caudal ZI                               | PPN: 25-60 Hz, 60 $\mu$ s, 1.9-3 V<br>ZI: 60 Hz, 60 $\mu$ s, 3-3.5 V   | 24 months (3-44)                              | PPN-DBS: 19% total UPDRS-III improvement (off-med); 33% items 27-30 improvement (off-med); zona incerta-DBS: 47% total UPDRS-III improvement (off-med); 41% items 27-30 improvement (off-med); combined PPN/zona incerta-DBS: 47% total UPDRS-III improvement (off-med); 50% items 27-30 improvement (off-med) |
| Khan et al. 2012a     | 5  | PD                   | Axial disability | Bilateral PPN<br>Bilateral caudal ZI                  | Unspecified                                                            | 12-60 months (mean of 27 mths)                | Bilateral PPN-DBS: 18% motor UPDRS improvement; bilateral ZI-DBS: 31% motor UPDRS improvement; combined unilateral PPN & bilateral ZI-DBS stimulation: 35% motor UPDRS improvement; combined bilateral PPN & ZI-DBS: 42% motor UPDRS improvement                                                               |
| Mazzone et al. 2012   | 14 | PD                   | Axial disability | Unilateral PPN                                        | 25 Hz, 60 $\mu$ s, less than 2.5-3.0 V                                 | 1 month for UPDRS, 7-10 days for jaw analysis | 59% mean improvement in UPDRS motor scores from pre-op baseline (OFF-med); 47% mean improvement on items 27-30 and 54% mean improvement on items 18-19 (OFF-med)                                                                                                                                               |
| Insola et al. 2012    | 10 | PD                   | Axial disability | Unilateral PPN                                        | N/A                                                                    | N/A                                           | N/A                                                                                                                                                                                                                                                                                                            |
| Peppe et al. 2012     | 5  | PD                   | Axial disability | Bilateral STN & PPTg                                  | STN: 185 Hz, 90 $\mu$ s, 2.1-2.9V<br>PPN: 25 Hz, 60 $\mu$ s, 1.8-2.2 V | 3 months, 1 year                              | At 3 months: 27% UPDRS-III improvement with combined PPTg/STN-DBS versus STN-DBS alone at 3 months; 41% PDSS mean global score increase with STN-ON, 35% increase with PPTg-ON, and 57% increase with PPTg-cycle                                                                                               |

|                          |   |      |                  |                                     |                                            |                                          |                                                                                                                                                                                                                                                                                                                                                 |
|--------------------------|---|------|------------------|-------------------------------------|--------------------------------------------|------------------------------------------|-------------------------------------------------------------------------------------------------------------------------------------------------------------------------------------------------------------------------------------------------------------------------------------------------------------------------------------------------|
|                          |   |      |                  |                                     |                                            |                                          | At 1 year: 26% UPDRS-III improvement with combined PPTg/STN-DBS or STN-DBS alone                                                                                                                                                                                                                                                                |
| Thevathasan et al. 2012  | 7 | PD   | Axial disability | Bilateral PPN                       | 36-42 Hz, 60 $\mu$ s, 2.2-4.3 V            | 2-29 months                              | Bilateral PPN-DBS: reduced turn task duration by 58%, unilateral PPN-DBS by 36%; bilateral stimulation associated with greater cadence percent improvement                                                                                                                                                                                      |
| Aviles-Olmos et al. 2011 | 1 | PD   | Axial disability | R PPN                               | 30 Hz, 60 $\mu$ s, 3 V                     | 6 months                                 | No objective change on UPDRS III subscores 28 and 30; improved freezing and walking velocity as per gait analysis                                                                                                                                                                                                                               |
| Caliandro et al. 2011    | 3 | PD   | Axial disability | R PPN (n=2), L PPN (n=1)            | 25 Hz, 60 $\mu$ s, 1.5-2.0 V               | Unspecified                              | Increased tibialis anterior activation during steady state of gait; extent of increased activation correlated with lower UPDRS-III; no significant improvement in UPDRS-III                                                                                                                                                                     |
| Ceravolo et al. 2011     | 6 | PD   | Axial disability | Bilateral PPN & STN                 | 25 Hz                                      | 12 months                                | Significantly improved delayed recall/executive functions; mean UPDRS improvement of 21% (variable outcomes)                                                                                                                                                                                                                                    |
| Franzini et al. 2011     | 1 | PD   | Axial disability | R PPN                               | 25 Hz, 60 $\mu$ s, 2 V                     | 6 months                                 | 48% UPDRS-III improvement; improved hand dexterity                                                                                                                                                                                                                                                                                              |
| Khan et al. 2011         | 7 | PD   | Axial disability | Bilateral PPN & caudal zona incerta | PPN: 60 Hz, 60 $\mu$ s, 2.4 V              | 12 months                                | Off medication, PPN stimulation improved the motor UPDRS by 18.8% (mean = 43.1+14., p=0.01). PPN stimulation improved the motor UPDRS axial subscore by 26.3%. On medication, PPN stimulation improved UPDRS by 17.9% (mean = 24.9±11.6, p = 0.03). Combined PPN/ZI stimulation: UPDRS axial subscore improved by 50 and 49% (off and on meds). |
| Thevathasan et al. 2011a | 8 | PD   | Axial disability | Bilateral mid-lower PPN             | 30 or 35 Hz, 60 $\mu$ s, 2.5-4.3V          | 6-34 months                              | PPN-DBS restored 'StartReact'; UPDRS-III items 27-30 improvement noted in 5 patients, GFQ improvement in 6, FOGQ improvement in 5, FallsQ in 3                                                                                                                                                                                                  |
| Thevathasan et al. 2011b | 5 | PD   | Axial disability | Bilateral mid-lower PPN             | 35 Hz, 60 $\mu$ s, mean 3.5 V              | 2 years                                  | 47% mean GFQ improvement (significant improvement from baseline at 6 months and 2 years); improved FOGQ in all patients; improvement in OFF-med UPDRS-III items 27-30 in all patients                                                                                                                                                           |
| Wilcox et al. 2011       | 1 | PPFG | Axial disability | Bilateral PPN                       | 35 Hz, 60 $\mu$ s, 2.8-3.8 V               | 14 months                                | 64% GFQ and 50% FOGQ improvement; notable increase in stride length, cadence, walking velocity; reduced time spent in double-limb support; improvement in mediolateral but not anteroposterior standing balance; subacute PET imaging findings reported                                                                                         |
| Arnulf et al. 2010       | 2 | PD   | Axial disability | Bilateral PPN                       | PPN: 15-25 Hz, 60 or 90 $\mu$ s, 1.2-3.8 V | 1 year                                   | Moderate to major improvement of all gait measures                                                                                                                                                                                                                                                                                              |
| Stefani et al. 2010c     | 6 | PD   | Axial disability | Bilateral STN & PPN                 | PPN: 25 Hz, 60 $\mu$ s, 1.5-2.0 V          | Unspecified                              | PPN-DBS improved delayed recall, executive function, phonemic fluency in all patients; 2 patients who underwent sleep architecture testing showed increased sleep efficiency (from <80% to >90%), mildly reduced Stage 1, increased Stage 2 and REM, and decreased awakenings                                                                   |
| Costa et al. 2010        | 5 | PD   | Axial disability | Bilateral STN & PPN                 | PPN: 25 Hz, 60 $\mu$ s, 1.8-2.2 V          | $\geq$ 3 months                          | 29% UPDRS-III improvement; acute effect of DBS on <i>n-back</i> task and reaction time reported                                                                                                                                                                                                                                                 |
| Ferraye et al. 2010a     | 6 | PD   | Axial disability | Bilateral STN & PPN                 | PPN: 15-25 Hz, 60 or 90 $\mu$ s, 1.2-3.8 V | 1 year                                   | Open-label improvement in duration of freezing episodes (med-OFF) and freezing-related falls but not gait or postural stability; no significant change from DBS-OFF observed in double-blind evaluation                                                                                                                                         |
| Ostrem et al. 2010       | 1 | PPFG | Axial disability | Bilateral PPN                       | 25 Hz, 60 $\mu$ s, 4.9/4.4 V (L/R)         | Preop:<br>3 month<br>6 month<br>12 month | UPDRS-III total unchanged from baseline; mild improvement of timed gait measures; worsening of UPDRS daily living subscore                                                                                                                                                                                                                      |
| Peppe et al. 2010        | 5 | PD   | Axial disability | Bilateral STN & PPTg                | PPN: 25 Hz, 60 $\mu$ s, 1.5-2.0 V          | $\geq$ 1 year                            | Combined STN and PPTg-DBS associated with significant differences in mean gait velocity in OFF-med but not ON-med condition                                                                                                                                                                                                                     |
| Schweder et al. 2010     | 1 | PD   | Axial disability | Bilateral PPN                       | Unspecified                                | 12 months                                | PPN-DBS associated with 42% GFQ improvement and 14% FOGQ improvement;                                                                                                                                                                                                                                                                           |

|                          |                                               |         |                  |                                                         |                                                                                 |                 |                                                                                                                                                                                                                                                                                                                                                                   |
|--------------------------|-----------------------------------------------|---------|------------------|---------------------------------------------------------|---------------------------------------------------------------------------------|-----------------|-------------------------------------------------------------------------------------------------------------------------------------------------------------------------------------------------------------------------------------------------------------------------------------------------------------------------------------------------------------------|
|                          |                                               |         |                  |                                                         |                                                                                 |                 | PPN-DBS reduced cortical and brainstem connectivity and normalized (increased) cerebellar connectivity (probabilistic tractography)                                                                                                                                                                                                                               |
| Stefani et al. 2010b     | 1                                             | PD      | Axial disability | Bilateral STN & PPN                                     | PPN: 20 Hz (initially ON only during sleep; later ON continuously with STN DBS) | ~1-2 years      | Bedtime PPN-DBS: increased verbal fluency and working memory; restored rapid-eye movement sleep phases; increased 'well-being'; continuous PPN-DBS: severe dopamine dysregulation syndrome (pathological gambling, compulsive shopping, hypersexuality, drug craving) developed after several weeks of continuous stimulation - relieved by switching off PPN-DBS |
| Stefani et al. 2010a     | 6                                             | PD      | Axial disability | Bilateral STN & PPN                                     | PPN: 25 Hz, 60 $\mu$ s, 1.4-2.4 V                                               | $\geq$ 1 year   | Increased verbal fluency and working memory; state of 'well-being' with occasional euphoria; restoration of REM sleep phases; increased rCBF in various prefrontal cortical areas and left ventral striatum, amongst other metabolic changes (PET imaging)                                                                                                        |
| Thevathasan et al. 2010  | 11                                            | PD      | Axial disability | Bilateral PPN (n=8), bilateral PPN & zona incerta (n=3) | 30 Hz, 60 $\mu$ s, 2.0-3.7 V                                                    | 2-38 months     | Chronic stimulation improved fall frequency; fall score improvement correlated with improvement in reaction time (assessed acutely following PPN stimulation)                                                                                                                                                                                                     |
| Moro et al. 2010         | 6                                             | PD      | Axial disability | Unilateral PPN                                          | 5-130 Hz; 60-120 $\mu$ s; 1.9 V (range from 0.7-3.8 V)                          | 3 and 12 months | Significant open-label improvement in overall ON-DBS UPDRS score at 3 and 12 months versus baseline (tendency for decline in motor improvement between 3 and 12 months); no significant difference between ON and OFF UPDRS-II/UPDRS-III scores during double-blind assessment                                                                                    |
| Ballanger et al. 2009    | 3                                             | PD      | Axial Disability | Unilateral PPN                                          | 50-90 Hz, 60-120 $\mu$ s, 1.4-2.6 V                                             | 4-22 months     | Variable improvement in total clinical and axial outcomes; acute PET imaging findings reported                                                                                                                                                                                                                                                                    |
|                          | 2                                             | PD      | Axial Disability | L PPN                                                   | 70-90 Hz, 70-120 $\mu$ s, 1.4-2.6 V                                             | 22 months       | UPDRS-III total worsened by 7.5-34.2%. Items 28-30 improved by 16.7-53.8%                                                                                                                                                                                                                                                                                         |
|                          | 1                                             | PD      | Axial Disability | R PPN                                                   | 50 Hz, 60 $\mu$ s, 1.4 V                                                        | 4 months        | UPDRS-III total worsened by 14.3%. Items 28-30 was unchanged                                                                                                                                                                                                                                                                                                      |
| Ferraye et al. 2009      | 2                                             | PD      | Axial Disability | Bilateral PPN                                           | N/A                                                                             | N/A             | No clinical results reported                                                                                                                                                                                                                                                                                                                                      |
| Lim et al. 2009          | 5                                             | PD, PSP | Axial disability | Unilateral PPN                                          | 5-70 Hz, 1-2.8 V                                                                | 4-12 months     | 1-22% increase in REM sleep                                                                                                                                                                                                                                                                                                                                       |
|                          | 3                                             | PD      | Axial disability | unilateral PPN                                          | 70 Hz, 1-2.3 V                                                                  | 4 months        | REM% increased by 2-14%                                                                                                                                                                                                                                                                                                                                           |
|                          | 2                                             | PSP     | Axial disability | unilateral PPN                                          | 5-30 Hz, 2-2.8 V                                                                | 7 months        | REM% increased by 1-7%                                                                                                                                                                                                                                                                                                                                            |
| Zanini et al. 2009       | 5                                             | PD      | Axial disability | Bilateral STN & PPN                                     | PPN: 25 Hz, 60 $\mu$ s, 1.5-2.2 V                                               | 6-12 months     | Stimulation of STN, PPN, or both targets showed a trend towards reduction of grammatical errors.                                                                                                                                                                                                                                                                  |
| Romigi et al. 2008       | 1                                             | PD      | Axial disability | Bilateral STN & PPN                                     | PPN: 25 Hz, 2 V, 60 $\mu$ s                                                     | 1 year          | PPN-DBS improved sleep efficiency and increased REM up to 12.9%                                                                                                                                                                                                                                                                                                   |
| Strafella et al. 2008    | 1                                             | PD      | Axial disability | L PPN                                                   | 70 Hz, 90 $\mu$ s, 2.2 V                                                        | 3 months        | 19% UPDRS-III improvement with PPN-DBS versus stimulation-OFF; increased rCBF to thalamus, putamen, cerebellum, and insular cortex (PET imaging)                                                                                                                                                                                                                  |
| Plaha et al. 2007        | 11 (only 2 patients received PPN stimulation) | PD      | Parkinsonism     | Bilateral PPN                                           | N/A                                                                             | N/A             | N/A                                                                                                                                                                                                                                                                                                                                                               |
| Stefani et al. 2007      | 6                                             | PD      | Axial disability | Bilateral STN & PPN                                     | PPN: 25 Hz, 60 $\mu$ s, 1.5-2.0 V                                               | 3 months        | 66% UPDRS-III improvement with combined STN and PPN-DBS (most effective configuration)                                                                                                                                                                                                                                                                            |
| Plaha & Gill et al. 2005 | 2                                             | PD      | Axial disability | Bilateral PPN                                           | 20-25 Hz, 90 $\mu$ s, 2.5-4.0 V                                                 | 16-42 days      | Improvement in total clinical outcomes and axial domains; 50-55% total UPDRS-III improvement; 40-67% items 27-30 improvement                                                                                                                                                                                                                                      |
| Mazzone et al. 2005      | 2                                             | PD      | Axial disability | Bilateral PPN                                           | 10 or 80 Hz, 60 $\mu$ s, 2 V                                                    | Acute only      | No clinical results reported                                                                                                                                                                                                                                                                                                                                      |

| LOCUS COERULEUS (LC)               |    |                                                  |                                |                                                      |                                                        |                            |                                                                                                                                                                                                |
|------------------------------------|----|--------------------------------------------------|--------------------------------|------------------------------------------------------|--------------------------------------------------------|----------------------------|------------------------------------------------------------------------------------------------------------------------------------------------------------------------------------------------|
| Feinstein et al. 1989              | 3  | Cerebral Palsy and Epilepsy                      |                                | LC                                                   |                                                        |                            |                                                                                                                                                                                                |
|                                    |    | Cerebral palsy                                   | Spasticity                     | L LC & L dentate nucleus & R RN                      | 60 Hz, 120 $\mu$ s, 0.2 mA                             | N/A (long term)            | Increased ease of feeding/decreased choking on food; reduced REM and non-REM sleep; patient more quiet/relaxed                                                                                 |
|                                    |    | Epilepsy                                         | Seizure                        | LC (side unknown)                                    | 50 Hz, 100 $\mu$ s, 0.9mA                              | 7 months                   | 50% decrease in required medication dosage at 3 weeks; decreased seizure frequency (from 3-22 seizures/mo to 0-7 per month) at 7 months                                                        |
|                                    |    | Epilepsy                                         | Seizure                        | R LC                                                 | 0.2-0.4 mA                                             | 6 weeks                    | Lengthening of pre-seizure aura to ~10-30 mins (permitting time to self-inject diazepam). Generally shorter-lasting seizures                                                                   |
| PARABRACHIAL COMPLEX (PBC)         |    |                                                  |                                |                                                      |                                                        |                            |                                                                                                                                                                                                |
| Young et al. 1992                  | 6  | Intractable chronic pain                         | Pain Relief                    | Unilateral PBC (n=2), unilateral PBC & PVG/PAG (n=4) | 50-60 Hz, 100 $\mu$ s, 3-6 V                           | 0.5-2 years                | Good-to-excellent pain relief in 3 patients                                                                                                                                                    |
|                                    |    | Spinal cord injury                               | Pain relief                    | R PVG & R PBC                                        |                                                        | 2 years                    | Excellent pain relief                                                                                                                                                                          |
|                                    |    | Post-herpetic neuralgia                          | Pain relief                    | R PBC                                                |                                                        | 3 months                   | Excellent pain relief                                                                                                                                                                          |
|                                    |    | Multiple myeloma                                 | Pain relief                    | L PVG & L PBC                                        |                                                        | 8 months                   | Good pain relief                                                                                                                                                                               |
|                                    |    | Post-herpetic neuralgia                          | Pain relief                    | R PBC                                                |                                                        | 6 months                   | No pain relief                                                                                                                                                                                 |
|                                    |    | Post-herpetic neuralgia                          | Pain relief                    | R PVG & R PBC                                        |                                                        | Electrode not internalized | No pain relief                                                                                                                                                                                 |
|                                    |    | Thalamic (central post-stroke) pain              | Pain relief                    | L PAG & L PBC                                        |                                                        | 3 months                   | No pain relief                                                                                                                                                                                 |
| Katayama et al. 1985               | 2  | Opioid-resistant chronic pain due to lung cancer | Pain relief                    | Unilateral PBC & sensory thalamus                    | 10-30 Hz                                               | 2 months                   | Intermittent PBC stimulation provided sufficient pain reduction to not require analgesics; thalamic stimulation alone did not confer satisfactory pain relief                                  |
| SUPERIOR CEREBELLAR PEDUNCLE (SCP) |    |                                                  |                                |                                                      |                                                        |                            |                                                                                                                                                                                                |
| Horisawa et al. 2019               | 1  | Fixed Dystonia                                   | Increased muscle tone and pain | SCP, dentate nucleus                                 | 200 Hz, 150 $\mu$ s, 8 V                               | 6 months                   | Ipsilateral body relaxation and pain reduction; improved trunk opisthotonus and neck dystonia; improved ADLs                                                                                   |
| Harat et al. 2009                  | 13 | Cerebral Palsy                                   | Increased muscle tone          | SCP                                                  | N/A                                                    | 2 years                    | Reduced muscle tone in 11 patients; speech improvement in 7 patients; mood improvement and decreased pain in all patients; decreased frequency/intensity of seizures in patients with epilepsy |
| Galanda & Hovath et al. 1997       | 32 | Cerebral palsy (n=31), stroke (n=1)              | Spasticity and dyskinesias     | SCP                                                  | 200 Hz, 1-0.2 mA, 1-6 V (3-8 times/day for 15-20 mins) | N/A                        | Decreased hypertonus/spasticity (stopping stimulation resulted in recurrence of spasticity); decreased involuntary movements (gradually, after ~1 month of stimulation)                        |

Abbreviations. **ADL** = activities of daily living; **BDI** = Beck's depression inventory; **BP** = blood pressure; **CGI** = Clinical global impressions; **CH** = cluster headache; **CPSP** = central post-stroke pain; **CRPS** = complex regional pain syndrome; **CSF** = cerebrospinal fluid; **DBS** = deep brain stimulation; **ESS** = Epworth sleepiness scale; **EQ-5D** = European quality of life - 5D; **FallsQ** = falls questionnaire; **fMRI** = functional magnetic resonance imaging; **FOGQ** = freezing of gait questionnaire; **GAF** = global assessment of function; **GPI** = globus pallidus internus; **HAMA** = Hamilton Anxiety rating scale; **HAMD** = Hamilton depression rating scale; **Hx** = hertz; **L** = left; **LC** = locus coeruleus; **MADRS** = Montgomery-Asberg Depression Rating scale; **MFB** = medial forebrain bundle; **ML** = medial lemniscus; **mmHg** = millimeters of mercury; **MPQ** = McGill pain questionnaire; **mRF** = mesencephalic reticular formation; **MS** = multiple sclerosis; **N/A** = not applicable; **NAcc** = nucleus accumbens; **NPS** = neuropathic pain scale; **OCD** = obsessive compulsive disorder; **PAG** = periaqueductal gray; **PBC** = parabrachial complex; **PD** = Parkinson's disease; **PPFG** = primary progressive freezing of gait; **PDSS** = Parkinson's disease sleep scale; **PET** = positron emission tomography; **PME** = progressive myoclonic epilepsy; **PPN** = pedunculopontine nucleus; **PSP** = progressive supranuclear palsy; **PSPRS** = progressive supranuclear palsy rating scale; **PVG** = periventricular gray; **QoL** = quality of life; **R** = right; **REM** = rapid eye movement sleep; **RN** = red nucleus; **SC** = superior colliculus; **SCP** = superior cerebellar peduncles; **SF-36** = 36 item short form survey; **sMFB** = superolateral branch of medial forebrain bundle **SN** = substantia nigra; **SNr** = substantia nigra pars reticulata; **STN** = subthalamic nucleus; **SUNCT** = short lasting unilateral neuralgiform headache attacks with conjunctival injection and tearing; **TBI** = traumatic brain injury; **TRD** = treatment resistant depression; **UPDRS** = unified Parkinson's disease rating scale; **V** = volts; **VAS** = visual analogue scale; **VPL** = ventral posterolateral nucleus; **VPM** = ventral posteromedial nucleus; **VTA** = ventral tegmental area; **YBOCS** = Yale-Brown Obsessive Compulsive Disorder; **Zi** = zona incerta.



**Table 2 - Acute effects of Brainstem DBS.** Table cataloguing the acute effects associated with stimulation of brainstem targets, as reported by brainstem DBS studies.

| Study                                                              | n  | Reported substrate                                                                                                                                                    | Stimulation parameters                                  | Reported acute effects of stimulation                                                                                                                                                                                                                                                                                                                                                                                  |
|--------------------------------------------------------------------|----|-----------------------------------------------------------------------------------------------------------------------------------------------------------------------|---------------------------------------------------------|------------------------------------------------------------------------------------------------------------------------------------------------------------------------------------------------------------------------------------------------------------------------------------------------------------------------------------------------------------------------------------------------------------------------|
| <b>SUBSTANTIA NIGRA (SN)</b>                                       |    |                                                                                                                                                                       |                                                         |                                                                                                                                                                                                                                                                                                                                                                                                                        |
| Ulla et al. 2011                                                   | 5  | Bilateral SN/STN                                                                                                                                                      | 130 Hz, 60 $\mu$ s, 2-4 V                               | Sustained elevated mood (>1 hour) after less than 5 minutes of stimulation at SN-located contacts; increased rCBF in dorsal anterior cingulate, right primary motor, medial prefrontal cortex, right pallidum and decreased rCBF in left temporal cortex and bilateral occipital cortex in manic versus euthymic condition (PET imaging)                                                                               |
| Blomstedt et al. 2008                                              | 1  | R SN pars reticulata (most ventral contact prior to 2 mm retraction of lead)                                                                                          | 120 Hz, 60 $\mu$ s, 2V                                  | Decreased rigidity; sorrowful affect/crying, depressed mood ('everything is so dark', depressed mood confirmed by patient), transient suicidal ideation beginning within a few seconds of stimulation and ending within 10 seconds of stimulation cessation                                                                                                                                                            |
| Vesper et al. 2007                                                 | 1  | Bilateral SN pars reticulata (ventral contacts)/STN (dorsal contacts)                                                                                                 | 130 Hz, 90 $\mu$ s, started at 2.3 V increased to 3 V   | Dysesthesias in hands (subsided after a few minutes)                                                                                                                                                                                                                                                                                                                                                                   |
| Ulla et al. 2006                                                   | 1  | Bilateral SN (STN was intended target)                                                                                                                                | 130 Hz, 60 $\mu$ s, 2.2 V, at ventral-most contacts     | Manic symptoms (mood exaltation, inflated self-esteem/overestimation of self-capacities leading to frequent falls, logorrhea associated with flight of ideas, distractibility, psychomotor agitation, subsequent emotional lability) reversibly elicited after 45 minutes of stimulation                                                                                                                               |
| Kulisevsky et al. 2002                                             | 3  | Bilateral SN pars reticulata (STN was intended target)                                                                                                                | 130 Hz, 60 $\mu$ s, 2 V                                 | Manic symptoms elicited (elation, inflated self-esteem, overactivity, logorrhea with flight of ideas, sexual indiscretion, and insomnia) within 48 hr of stimulation onset                                                                                                                                                                                                                                             |
| Bejjani et al. 1999                                                | 1  | Bilateral SN pars compacta and pars reticulata (STN was intended target) - only L side stimulated SN at most ventral contacts                                         | L SN: 130 Hz, 60 $\mu$ s, 2.4 V at ventral-most contact | Depressed mood, negative affect (crying, agitation), illusion of bodily motion elicited within 5 seconds of stimulation onset and disappeared ~1 minute after stimulation cessation (replaced by mild hypomanic state for next 5 minutes); increased rCBF in right parietal lobe, left orbitofrontal cortex, left globus pallidus, left amygdala, and left anterior thalamus in L SN-DBS ON vs OFF state (PET imaging) |
| <b>RED NUCLEUS (RN)</b>                                            |    |                                                                                                                                                                       |                                                         |                                                                                                                                                                                                                                                                                                                                                                                                                        |
| Lefranc et al. 2014                                                | 1  | L RN                                                                                                                                                                  | 20/60/130 Hz, 2-7 mA                                    | Increased intentional tremor intensity, confusion, dysautonomic symptoms (tachycardia, flushing, polypnoea) with higher amplitude stimulation; paresthesias (with lower/middle RN stimulation), oculomotor dysfunction (with upper/lower RN stimulation) at lower frequencies only                                                                                                                                     |
| Bejjani et al. 2002                                                | 4  | L (n=1) and bilateral (n=3 - only one side stimulated at a time) white matter between red nucleus and anterodorsal substantia nigra (in vicinity of oculomotor nerve) | 130 Hz, 60 $\mu$ s, 1-3 V                               | Contralateral upper limb tremor & dystonic pressure, ipsilateral diplopia (impaired abduction and vertical eye movements), enophthalmos; immediately reversible with stimulation cessation                                                                                                                                                                                                                             |
| Feinstein* et al. 1989                                             | 1  | R RN                                                                                                                                                                  | 150 Hz, 200 $\mu$ s, 0.3-0.6 mA                         | Inadequate spasticity control in left upper extremity (both arms loosened initially but tightened again after 10 minutes of stimulation); strabismus at higher amplitude                                                                                                                                                                                                                                               |
| <b>VENTRAL TEGMENTAL AREA (VTA)/POSTERIOR HYPOTHALAMUS (pHypo)</b> |    |                                                                                                                                                                       |                                                         |                                                                                                                                                                                                                                                                                                                                                                                                                        |
| Akram et al, 2017                                                  | 7  | Bilateral VTA                                                                                                                                                         | N/A                                                     | Transient dizziness, intermittent diplopia, nausea                                                                                                                                                                                                                                                                                                                                                                     |
| Akram et al, 2016                                                  | 21 | Bilateral VTA                                                                                                                                                         | 185 Hz, 60 $\mu$ s                                      | Diplopia, vertigo, oscillopsia, ophthalmoplegia                                                                                                                                                                                                                                                                                                                                                                        |
| Leone et al, 2013                                                  | 19 | Bilateral pHypo                                                                                                                                                       | 180 Hz, 60 $\mu$ s, 7 V                                 | Short lasting vertigo and transient double vision                                                                                                                                                                                                                                                                                                                                                                      |
| Maniyar et al, 2012                                                | 1  | L pHypo                                                                                                                                                               | 185 Hz, 60 $\mu$ s, 2 V                                 | Repeated paroxysms of sneezing                                                                                                                                                                                                                                                                                                                                                                                         |
| Seijo et al, 2011                                                  | 5  | Bilateral pHypo                                                                                                                                                       | 130 Hz, 60-12 $\mu$ s, 2-3.5 V                          | Persistent myosis, euphoria, dizziness, blurring vision, concentration difficulties, cervical dystonia, generalized headache, increased appetite                                                                                                                                                                                                                                                                       |
| Fontaine et al, 2010                                               | 11 | Bilateral pHypo                                                                                                                                                       | 185 Hz, 60 $\mu$ s, 3 V                                 | Transient hemiparesis and loss of consciousness, micturition syncope                                                                                                                                                                                                                                                                                                                                                   |
| Lyons et al, 2009                                                  | 1  | L pHypo                                                                                                                                                               | 160 Hz, 90 $\mu$ s, 1-4 V                               | Significant erectile dysfunction, jaw pulling and leg jerking                                                                                                                                                                                                                                                                                                                                                          |

|                                                                                                                                                                |     |                                       |                                                                |                                                                                                                                                                                                                                                                                                                  |
|----------------------------------------------------------------------------------------------------------------------------------------------------------------|-----|---------------------------------------|----------------------------------------------------------------|------------------------------------------------------------------------------------------------------------------------------------------------------------------------------------------------------------------------------------------------------------------------------------------------------------------|
| Bartsch et al, 2008                                                                                                                                            | 6   | L pHypo                               | 13-35 Hz, 60 $\mu$ s, 1-3.5V                                   | Arterial hypertension, diplopia, vertigo, feelings of panic                                                                                                                                                                                                                                                      |
| Kuhn et al, 2008                                                                                                                                               | 1   | Bilateral pHypo                       | 130 Hz, 90 $\mu$ s, 1-5 V                                      | Pleasant sense of inner pacification                                                                                                                                                                                                                                                                             |
| Broggi et al, 2007                                                                                                                                             | 20  | Bilateral pHypo                       | 180 Hz, 60 $\mu$ s, 1-3 V                                      | Asymptotic orthostatic hypotension triggered by electrical stimulation                                                                                                                                                                                                                                           |
| Leone et al, 2006                                                                                                                                              | 16  | Bilateral pHypo                       | 180 Hz, 60 $\mu$ s, 4-5 V                                      | Acute stimulation begun/ramped up upon CH attack onset caused side-effects (sweating, dizziness, diplopia, other visual disturbances) in 28/136 CH attacks, $\geq$ 50% pain reduction in 25/136 attacks, and complete pain relief in 17/136 attacks                                                              |
| Schoenen et al, 2005                                                                                                                                           | 4   | Unilateral pHypo                      | 185 Hz, 60-90 $\mu$ s, 2-4.5 V                                 | Diplopia and dizziness occurred in all patients at above 1.5 V                                                                                                                                                                                                                                                   |
| Franzini et al, 2003                                                                                                                                           | 5   | Bilateral pHypo                       | 180 Hz, 60 $\mu$ s, 1-7 V                                      | Conjugated ocular deviation in all patients with stimulation of >4 V                                                                                                                                                                                                                                             |
| <b>MEDIAL FOREBRAIN BUNDLE (MFB)</b>                                                                                                                           |     |                                       |                                                                |                                                                                                                                                                                                                                                                                                                  |
| Schlaepfer et al. 2013                                                                                                                                         | 7   | Bilateral sMFB                        | 2.3-4.9 mA                                                     | Blurred vision, strabismus, dizziness, increased sweating reported at higher stimulation amplitudes                                                                                                                                                                                                              |
| Fenoy et al. 2018; Fenoy et al. 2016                                                                                                                           | 6   | Bilateral sMFB                        | 8-10 V; >8.5 V                                                 | Transient/reversible diplopia reported in all patients during stimulation of certain contacts/during larger parameter changes                                                                                                                                                                                    |
| Blomstedt et al. 2017                                                                                                                                          | 1   | Bilateral sMFB                        | >3 V (prior to electrode revision)                             | Blurred vision                                                                                                                                                                                                                                                                                                   |
| Bewernick et al. 2017                                                                                                                                          | 8   | Bilateral sMFB                        | N/A                                                            | Strabismus/oculomotor changes (n=8) & blurred vision (n=5) reported at higher voltages, especially at lowest contact, Other effects reported were dizziness (n=4), intraocular pressure (n=2), sweating (n=2) blood pressure decrease (n=1 patient), dyskinesia (n=1), and sensation of 'internal unrest' (n=1). |
| Coenen et al. 2017                                                                                                                                             | 2   | Bilateral sMFB                        | 3.5-3.6 mA                                                     | Tachycardia, oculomotor changes at the deepest contact                                                                                                                                                                                                                                                           |
| Coenen et al. 2019                                                                                                                                             | 16  | Bilateral sMFB                        | >3 mA                                                          | Oculomotor symptoms, transient hypomania (n=6), restlessness (n=1), dyskinesia (n=1)                                                                                                                                                                                                                             |
| <b>MESENCEPHALIC RETICULAR FORMATION (mRF)</b>                                                                                                                 |     |                                       |                                                                |                                                                                                                                                                                                                                                                                                                  |
| Tsubokawa et al. 1990; Katayama et al. 1991; Yamamoto et al. 2002; Yamamoto et al. 2005; Yamamoto & Katayama, 2005; Yamamoto et al. 2010; Yamamoto et al. 2013 | 2   | Unilateral mRF                        | 25-50 Hz, variable voltage                                     | Immediate strong arousal responses (eye opening, pupil dilation, mouth opening/meaningless vocalization, slight movement of extremities, minor increase in systemic blood pressure)                                                                                                                              |
| <b>PERIAQUEDUCTAL GRAY/PERIVENTRICULAR GRAY (PAG/PVG)</b>                                                                                                      |     |                                       |                                                                |                                                                                                                                                                                                                                                                                                                  |
| Hollingworth et al. 2017                                                                                                                                       | 3   | PVG/PAG                               | 10 Hz, 60-110 $\mu$ s, 3.5-4.5 V                               | Cold sensation (n=1), warm sensation and reduced cold pain (n=1), reduced allodynia (n=1)                                                                                                                                                                                                                        |
| Sim-Williams et al. 2017                                                                                                                                       | 5   | Unilateral rostral dorsal/lateral PAG | N/A                                                            | ON-DBS and OFF-DBS PET imaging scans performed 4.5 hours apart showed increased opioid peptide binding in caudal dorsal PAG with analgesic PAG-DBS but no blood flow changes; systemic naloxone administration did not affect analgesic effect of DBS                                                            |
| Gray et al. 2014                                                                                                                                               | N/A | Bilateral superior PVG                | 10-50 Hz, 120 $\mu$ s, 5 V                                     | Warm feeling or paresthesia in the area of pain/pain suppression                                                                                                                                                                                                                                                 |
| Pereira et al. 2013b                                                                                                                                           | 5   | Unilateral PVG/PAG                    | 10-80 Hz, 120-450 $\mu$ s, 2-3 V                               | Rostral PVG/PAG stimulation produced warmth sensation/analgesia in the legs, caudal stimulation in arms and then face; stimulation altered somatosensory evoked potential in corresponding areas                                                                                                                 |
| Papuc et al. 2013                                                                                                                                              | 1   | Bilateral PVG/PAG                     | 50 Hz                                                          | Alleviation of thalamic hand tremor; paresthesia in the contralateral limb                                                                                                                                                                                                                                       |
| Boccard et al. 2013                                                                                                                                            | 85  | Bilateral posterior PVG               | 22.8 $\pm$ 11.4 Hz, 193.8 $\pm$ 104.5 $\mu$ s, 2.3 $\pm$ 1.1 V | Occasional sensation of warmth, pain relief in contralateral painful body areas                                                                                                                                                                                                                                  |
| Green et al. 2012                                                                                                                                              | 6   | PAG & VPL (n=5), PAG (n=1)            | 20-50 Hz, 90-450 $\mu$ s, 0.5-7 V                              | PAG stimulation associated with higher maximum cystometric capacity                                                                                                                                                                                                                                              |
| Hyam et al. 2012a                                                                                                                                              | 10  | Unilateral PAG                        | 5-40 Hz, 120-450 $\mu$ s, 0.5-7.3 V                            | Stimulation associated with increased peak expiratory flow rate (13 $\pm$ 5%); no change in forced vital capacity                                                                                                                                                                                                |

|                                   |    |                                                                      |                                   |                                                                                                                                                                                                                                                                            |
|-----------------------------------|----|----------------------------------------------------------------------|-----------------------------------|----------------------------------------------------------------------------------------------------------------------------------------------------------------------------------------------------------------------------------------------------------------------------|
| Mallory et al. 2012               | 1  | R PVG/PAG                                                            | 130 Hz, 300 $\mu$ s, 3.5 V        | Eye deviation; pain relief                                                                                                                                                                                                                                                 |
| Carter et al. 2011                | 1  | Unilateral PVG/PAG                                                   | 40 Hz, 450 $\mu$ s, 3.1 V         | Stimulation associated with transient increase then persistent decrease in mean brachial blood pressure (7%), increased brachial artery flow (106%), decreased total peripheral resistance (15%), increased stroke volume (13%), and cardiac output (12%)                  |
| Patel et al. 2011                 | 1  | Unilateral PVG/PAG                                                   | 10 Hz, 210 $\mu$ s, 5.4 V         | Gradual decrease in blood pressure starting immediately after stimulation onset                                                                                                                                                                                            |
| Green et al. 2010                 | 5  | Unilateral PVG/PAG                                                   | 10-50 Hz, 20 $\mu$ s, 3-4.5 V     | Altered systolic/diastolic blood pressure and heart rate variability                                                                                                                                                                                                       |
| Pereira et al. 2010               | 16 | Rostral PAG                                                          | 5-50 Hz, 60-450 $\mu$ s, 1-5.8 V  | Ventral but not dorsal PAG stimulation altered heart rate variability (decreasing LF/HF power ratio); LF/HF ratio changes correlated with subjective reporting of analgesic efficacy (VAS)                                                                                 |
| Pickering et al. 2009             | 1  | R PVG/PAG                                                            | 5 Hz, 240 $\mu$ s, 2 V            | Pain reduction and improvement in allodynia; degree of somatotopy evident: proximal electrodes affected lower limbs, distal electrodes affected face/upper limbs                                                                                                           |
| Owen et al. 2007a                 | 47 | Bilateral VPL, PVG                                                   | 5-30 Hz, 120-450 $\mu$ s, 2-4V    | Pain relief; sensation of warmth; eye bobbing (at intensity double that required for sensory effects)                                                                                                                                                                      |
| Pereira et al. 2007               | 3  | Bilateral VPL, PVG                                                   | 50 Hz, 50 $\mu$ s, 2.9 V          | Reduced pain                                                                                                                                                                                                                                                               |
| Green et al. 2006b                | 16 | Unilateral (n=14) and Bilateral (n=2) PAG                            | 5-80 Hz, 120-450 $\mu$ s, 0.5-5 V | Decreased (n=7; mean reduction: 13 $\pm$ 6 mmHg), or increased (n=4; mean increase: 12 $\pm$ 6 mmHg) systolic blood pressure                                                                                                                                               |
| Hamani et al. 2006                | 21 | Bilateral VPL, PVG                                                   | 25-120 Hz, 60-250 $\mu$ s, <10 V  | 'Pleasant sensation of warmth' with 25-50 Hz PVG stimulation (n=2); anxiety with >100 Hz PVG stimulation (n=1); medial eye deviation (n=1)                                                                                                                                 |
| Owen et al. 2006                  | 15 | Bilateral proximal part of PVG/PAG                                   | N/A                               | Paresthesias and sensation of warmth in contralateral area of pain; 'eye bobbing' induced at intensity of stimulation at least twice that required for sensory effects                                                                                                     |
| Rasche et al. 2006                | 56 | Bilateral VPL, PVG, medial lemniscus                                 | 40-70 Hz                          | Feeling of warmth, floating, and dizziness (50 Hz, 210 $\mu$ s); below AC-PC line, diplopia, gaze deviation, or gaze paralysis; blood pressure and heart rate elevation and anxiety (at higher intensities); pain (at higher, suprathreshold intensities)                  |
|                                   |    | Bilateral medial lemniscus                                           | 40-70 Hz                          | Paresthesias in the contralateral body with more posterior stimulation                                                                                                                                                                                                     |
| Green et al. 2005 (PMID:16237319) | 15 | Unilateral PVG/PAG (n=11), unilateral PVG/PAG and VPL thalamus (n=4) | 10Hz, 120 $\mu$ s, 4 V            | Ventral PVG/PAG stimulation (n=7) reduced arterial blood pressure (mean systolic decrease: 14 $\pm$ 4 mmHg) while dorsal stimulation (n=6) increased arterial blood pressure (mean systolic increase: 17 $\pm$ 6); thalamic stimulation produced no blood pressure changes |
| Nandi & Aziz, 2004                | 24 | Bilateral VPL, PVG (combined or separate)                            | 5-35 Hz                           | Sensation of warmth in area of pain (n=17); pain relief (n=17)                                                                                                                                                                                                             |
| Nandi et al. 2003                 | 8  | Bilateral PVG                                                        | 5-35 Hz                           | Sensation of warmth in area of pain; satisfactory pain relief (n=6)                                                                                                                                                                                                        |
| Nandi et al. 2002b                | 2  | L (contralateral to pain) VPL & PVG                                  | 9.6 V                             | Fit induced during post-op titration                                                                                                                                                                                                                                       |
| Phillips & Bhakta, 2000           | 1  | L PVG                                                                | 80 Hz, 200 $\mu$ s, 2 V           | Improvement in voluntary movement in paretic arm/leg; pain relief during rest                                                                                                                                                                                              |
| Rezai et al. 1999                 | 3  | PVG                                                                  | 25 - 50 Hz, 75-100 $\mu$ s, 2 V   | Generalized, diffuse warm sensation with corresponding activation of cingulate cortex (fMRI)                                                                                                                                                                               |
| Filho et al. 1996                 | 11 | PVG, VC, medial lemniscus                                            | N/A                               | VC and medial lemniscus stimulation induced unpleasant paresthesias (n=6); PVG stimulation alone induced pleasant (n=5) paresthesias                                                                                                                                       |
| Young et al. 1993                 | 9  | Unilateral PVG (n=3), unilateral PVG & VPL (n=6)                     | 25-120 Hz, 0.1-0.5 $\mu$ s        | Both PVG and VPL-DBS reduced pain (VAS) acutely; PVG-DBS but not VPL-DBS associated with acute increases in CSF beta-endorphin and methionine-enkephalin levels (cerebrospinal fluid analysis)                                                                             |
| Kumar et al. 1990                 | 38 | Unilateral PVG                                                       | 25-50 Hz, 0.1-0.5 $\mu$ s, 1-5 V  | Contralateral warmth/cold sensations, pleasure/sense of relaxation; pain reduction reported after 10 minutes of intra-operative stimulation in some cases                                                                                                                  |
|                                   |    | Edinger-Westphal nuclei/oculomotor nerve nuclei                      | 25-50 Hz, 0.1-0.5 $\mu$ s, 1-5 V  | Blurred vision, (at higher amplitudes) oscillopsia, nystagmus, upward gaze palsy                                                                                                                                                                                           |
|                                   |    | Medial lemniscus                                                     | 25-50 Hz, 0.1-0.5 $\mu$ s, 1-5 V  | Contralateral face paresthesias                                                                                                                                                                                                                                            |
| Levy et al. 1987                  | 1  | PAG/PVG                                                              | N/A                               | Patient immediately fell asleep upon stimulation initiation                                                                                                                                                                                                                |
| Hosobuchi et al. 1987             | 5  | Dorsal PAG                                                           | N/A                               | Immediate pain relief (n=7), nausea (n=5), fright/"funny feeling" (n=1), cold sensation in face/oropharynx (n=2), contralateral piloerection (n=1)                                                                                                                         |

|                                       |     |                                                                                                      |                                                                |                                                                                                                                                                                                                                         |
|---------------------------------------|-----|------------------------------------------------------------------------------------------------------|----------------------------------------------------------------|-----------------------------------------------------------------------------------------------------------------------------------------------------------------------------------------------------------------------------------------|
| Kumar et al. 1987                     | 2   | PAG                                                                                                  | Best stimulation parameters are 25-50Hz, 0.1-0.5 $\mu$ s, 1-5V | Blurred vision                                                                                                                                                                                                                          |
|                                       | 15  | PAG                                                                                                  | Best stimulation parameters are 25-50Hz, 0.1-0.5 $\mu$ s, 1-5V | Migraine-like symptoms                                                                                                                                                                                                                  |
| Young et al. 1985                     | 2   | PAG                                                                                                  | N/A                                                            | Eye movement disorder                                                                                                                                                                                                                   |
| Richardson et al. 1982                | 9   | PVG/PAG                                                                                              | N/A                                                            | Vertigo (n=1), tingling (n=2), warmth (n=3), increased pulse and blood pressure (n=1)                                                                                                                                                   |
| Richardson & et al. Akil 1977a        | 4   | PAG                                                                                                  | 25-75 Hz, 3.5-5 V                                              | Mild dizziness (n=3), nausea (n=1), contralateral arm paresthesias (n=1), chest tightness (n=1), nystagmus/conjugate deviation (n=1)                                                                                                    |
| Richardson & Akil et al. 1977b        | 8   | PVG                                                                                                  | 10-25 Hz, 0.6-1 V                                              | Paresthesias, heat/cold sensation, blurred vision, nystagmus, dizziness, mouth dryness                                                                                                                                                  |
| <b>PEDUNCULOPONTINE NUCLEUS (PPN)</b> |     |                                                                                                      |                                                                |                                                                                                                                                                                                                                         |
| Mazzone et al. 2013                   | N/A | PPTg                                                                                                 | N/A                                                            | Contralateral hemibody paresthesias elicited by stimulation onset or amplitude increase - disappeared spontaneously over time                                                                                                           |
| Jenkinson et al. 2012                 | 2   | Bilateral PPN region (possibly affecting SCP and uncinate fasciculus of the cerebellum)              | 5-20 Hz, 60 $\mu$ s, 2.5 V                                     | Transient 'shimmering' visual percept and small amplitude horizontal eye movement (eye movement frequency matched stimulation frequency) in 1 patient                                                                                   |
| Mazzone et al. 2012                   | N/A | Unilateral PPTg                                                                                      | 25 Hz, 60 $\mu$ s, <2.5-3 V                                    | Contralateral hemibody paresthesias elicited by stimulation onset, disappeared spontaneously within a few minutes                                                                                                                       |
| Aviles-Olmos et al. 2011              | 1   | R most caudal contact                                                                                | N/A                                                            | Involuntary urinary voiding                                                                                                                                                                                                             |
| Khan et al. 2011                      | N/A | Bilateral medial longitudinal fasciculus (lowest contact)                                            | N/A                                                            | Upward gaze palsy at higher voltages                                                                                                                                                                                                    |
|                                       | N/A | Bilateral laterally placed medial lemniscus                                                          | N/A                                                            | Paresthesia at higher voltages                                                                                                                                                                                                          |
| Franzini et al. 2011                  | 1   | L PPN                                                                                                | 25 Hz, 60 $\mu$ s, 2 V                                         | Improvement of hand dexterity                                                                                                                                                                                                           |
| Wilcox et al. 2011                    | 1   | Bilateral PPN                                                                                        | 35 Hz, 60 $\mu$ s, 2.8-3.8 V                                   | ON-DBS and OFF-DBS PET imaging scans performed 4 days apart showed normalization of hypoactive cerebellar and brainstem regions with PPN stimulation                                                                                    |
| Moro et al. 2010                      | 6   | Unilateral PPN (with suspected medial lemniscus, oculomotor system, spinothalamic tract involvement) | 2-185 Hz, 60 $\mu$ s                                           | Contralateral paresthesias in 6 patients; oscillopsia in 5 patients; contralateral warm sensation in 3 patients                                                                                                                         |
| Stefani et al. 2010                   | 1   | Unilateral PPTg                                                                                      | 20 Hz                                                          | State of well-being occasionally perturbed by euphoria                                                                                                                                                                                  |
| Thevathasan et al. 2010a              | 8   | Unilateral PPN (n=8), unilateral PPN & zona incerta (n=3)                                            | 20-35 Hz, 60 $\mu$ s, 2.0-3.7 V                                | PPN-DBS improved reaction time, gait, and balance                                                                                                                                                                                       |
| Ferraye et al. 2010a                  | N/A | Bilateral PPN                                                                                        | 25-130 Hz                                                      | Contralateral hemibody paresthesias (and pleasant heat sensation in 1 patient) at 130 Hz; ipsilateral oscillopsia and bilateral limb myoclonus at higher amplitudes of 25 Hz                                                            |
| Arnulf et al. 2010                    | 2   | Bilateral PPN                                                                                        | Low frequency: 10-25 Hz; high frequency: 80 Hz                 | Increased alertness with low frequency stimulation; non-rapid eye movement sleep induced by high frequency stimulation                                                                                                                  |
| Costa et al. 2010                     | 5   | Bilateral PPN, STN                                                                                   | PPN: 25 Hz, 60 $\mu$ s, 2 V                                    | PPN-DBS improved average response times on <i>n-back</i> task versus OFF-stimulation condition; disturbing paresthesia commonly reported with PPN stimulation onset that always disappeared in <3 min at low voltage/frequency settings |
| Thevathasan et al. 2010               | 11  | Bilateral PPN and zona incerta (ZI)                                                                  | 20-35 Hz                                                       | Improvement in items 27-30 of motor UPDRS but residual UPDRS did not change with therapeutic stimulation                                                                                                                                |
| Ferraye et al. 2009                   | 2   | Bilateral PPN, oculomotor nerve                                                                      | 5-25 Hz                                                        | Trembling' vision; no clinically observable abnormal eye movement but frequency-locked, voltage-dependent vertical/oblique movements of ipsilateral eye detected with oculomotor recording                                              |
| Ballanger et al. 2009                 | 3   | Unilateral PPN                                                                                       | 50-90 Hz, 60-120 $\mu$ s, 1.4-2.6 V                            | Increased glucose metabolism in bilateral thalamus, cerebellum, and ipsilateral ventral midbrain within 30 minutes of turning PPN stimulation ON; cortical metabolism changes also observed                                             |
| Ostrem et al. 2009                    | 1   | Bilateral PPN                                                                                        | <5 V                                                           | Visual effect (shimmer)                                                                                                                                                                                                                 |
| Plaha et al. 2008                     | 2   | Bilateral PPN                                                                                        | Maximal stimulation at 5-80 Hz, 90 $\mu$ s                     | Pins and needles in arms with and without diplopia                                                                                                                                                                                      |
| Stefani et al. 2007                   | N/A | Bilateral PPN                                                                                        | N/A                                                            | Paresthesias that disappeared in <3 minutes (unless high frequency or high volume was delivered)                                                                                                                                        |

|                                           |    |                                                                 |                                       |                                                                                                                                                                                                                                       |
|-------------------------------------------|----|-----------------------------------------------------------------|---------------------------------------|---------------------------------------------------------------------------------------------------------------------------------------------------------------------------------------------------------------------------------------|
| Mazzone et al. 2005                       | 2  | Bilateral PPN                                                   | 10 or 80 Hz, 60 $\mu$ s, 2 V          | Improved finger tapping at 10 Hz; modest worsening of finger tapping at 80Hz; feeling of 'well-being' at all settings                                                                                                                 |
| Plaha & Gill, 2005                        | 2  | Bilateral PPN, medial longitudinal fasciculus, medial lemniscus | "High frequency", 90 $\mu$ s, 2.5-4 V | Upper gaze palsy with stimulation of the lowermost contact adjacent to medial longitudinal fasciculus; paresthesias with stimulation of upper three contacts near to laterally placed medial lemniscus                                |
| <b>LOCUS COERULEUS (LC)</b>               |    |                                                                 |                                       |                                                                                                                                                                                                                                       |
| Feinstein et al. 1989                     | 1  | L LC                                                            | 60 Hz, 120 $\mu$ s, 0.2 mA            | Increased motility of fingers, arms and legs and greater ROM in shoulders and wrists                                                                                                                                                  |
| <b>SUPERIOR CEREBELLAR PEDUNCLE (SCP)</b> |    |                                                                 |                                       |                                                                                                                                                                                                                                       |
| Horisawa et al. 2019                      | 1  | Bilateral SCP, Dentate nucleus                                  | 8-10 V                                | Ipsilateral relaxation at lower voltages; forced laughter, nystagmus, ipsilateral eye deviation at >8.5 V                                                                                                                             |
| Galanda & Hovath et al. 1997              | 32 | SCP                                                             | 200 Hz, 1-0.2 mA, 1-6 V               | Muscle tone/spasticity reduction over 15-20 minutes following stimulation onset; intense feeling of pleasure (diminishing over time); reversible side-effects (pronounced posture, dyskinesias, feeling of fear) at higher amplitudes |

Abbreviations. **rCBF** = regional cerebral blood flow; **CH** = cluster headache; **DBS** = deep brain stimulation; **Hz** = hertz; **L** = left; **LC** = locus coeruleus; **MFB** = medial forebrain bundle; **ML** = medial lemniscus; **mmHg** = millimeters of mercury; **mRF** = mesencephalic reticular formation; **N/A** = not applicable; **PAG** = periaqueductal gray; **PBC** = parabrachial complex; **PD** = Parkinson's disease; **PET** = positron emission tomography; **PPN** = pedunculopontine nucleus; **PSP** = progressive supranuclear palsy; **PVG** = periventricular gray; **R** = right; **RN** = red nucleus; **SC** = superior colliculus; **SCP** = superior cerebellar peduncles; **SN** = substantia nigra; **SNr** = substantia nigra pars reticulata; **STN** = subthalamic nucleus; **V** = volts; **VAS** = visual analogue scale; **VPL** = ventral posterolateral nucleus; **VPM** = ventral posteromedial nucleus; **VTA** = ventral tegmental area; **Zi** = zona incerta.

Akil H, Richardson DE, Hughes J, Barchas JD. Enkephalin-like material elevated in ventricular cerebrospinal fluid of pain patients after analgetic focal stimulation. *Science* 1978; 201: 463–5.

Akram H, Miller S, Lagrata S, Hariz M, Ashburner J, Behrens T, et al. Optimal deep brain stimulation site and target connectivity for chronic cluster headache. *Neurology* 2017; 89: 2083–91.

Akram H, Miller S, Lagrata S, Hyam J, Jahanshahi M, Hariz M, et al. Ventral tegmental area deep brain stimulation for refractory chronic cluster headache. *Neurology* 2016; 86: 1676–82.

Alcaro A, Huber R, Panksepp J. Behavioral functions of the mesolimbic dopaminergic system: an affective neuroethological perspective. *Brain Res Rev* 2007; 56: 283–321.

Amboni M, Stocchi F, Abbruzzese G, Morgante L, Onofri M, Ruggieri S, et al. Prevalence and associated features of self-reported freezing of gait in Parkinson disease: the DEEP FOG study. *Parkinsonism Relat Disord* 2015; 21: 644–9.

Anderson WS, Lenz FA. Surgery Insight: deep brain stimulation for movement disorders. *Nat Rev Neurol* 2006; 2: 310–20.

Ángeles Fernández-Gil M, Palacios-Bote R, Leo-Barahona M, Mora-Encinas JP. Anatomy of the brainstem: a gaze into the stem of life. *Semin Ultrasound CT MR* 2010; 31: 196–219.

Arnulf I, Ferraye M, Fraix V, Benabid AL, Chabardès S, Goetz L, et al. Sleep induced by stimulation in the human pedunculopontine nucleus area. *Ann Neurol* 2010; 67: 546–9.

Aviles-Olmos I, Foltynie T, Panicker J, Cowie D, Limousin P, Hariz M, et al. Urinary incontinence following deep brain stimulation of the pedunculopontine nucleus. *Acta Neurochir* 2011; 153: 2357–60.

Ballanger B, Lozano AM, Moro E, van Eimeren T, Hamani C, Chen R, et al. Cerebral blood flow changes induced by pedunculopontine nucleus stimulation in patients with advanced Parkinson's disease: a [<sup>15</sup>O] H<sub>2</sub>O PET study. *Hum Brain Mapp* 2009; 30: 3901–9.

Ballanger B, van Eimeren T, Moro E, Lozano AM, Hamani C, Boulinguez P, et al. Stimulation of the subthalamic nucleus and impulsivity: release your horses. *Ann Neurol* 2009; 66: 817–24.

Bartsch T, Pinsker MO, Rasche D, Kinfe T, Hertel F, Diener HC, et al. Hypothalamic deep brain stimulation for cluster headache: experience from a new multicase series. *Cephalalgia* 2008; 28: 285–95.

Basbaum AI, Fields HL. Endogenous pain control mechanisms: review and hypothesis. *Ann Neurol* 1978; 4: 451–62.

Bejjani B-P, Arnulf I, Houeto J-L, Milea D, Demeret S, Pidoux B, et al. Concurrent excitatory and inhibitory effects of high frequency stimulation: an oculomotor study. *J Neurol Neurosurg Psychiatry* 2002; 72: 517–22.

Bejjani B-P, Damier P, Arnulf I, Thivard L, Bonnet A-M, Dormont D, et al. Transient acute depression induced by high-frequency deep-brain stimulation. *N Engl J Med* 1999; 340: 1476–80.

Benabid AL, Koukssí A, Benazzouz A, Vercueil L, Fraix V, Chabardès S, et al. Deep brain stimulation of the corpus luyisi (subthalamic nucleus) and other targets in Parkinson's disease. Extension to new indications such as dystonia and epilepsy. *J Neurol* 2001; 248: 37–47.

Benarroch EE. Brainstem integration of arousal, sleep, cardiovascular, and respiratory control. *Neurology* 2018; 91: 958–66.

Bewernick BH, Kayser S, Gippert SM, Switala C, Coenen VA, Schlaepfer TE. Deep brain stimulation to the medial forebrain bundle for depression- long-term outcomes and a novel data analysis strategy. *Brain Stimul* 2017; 10: 664–71.

Bittar RG, Otero S, Carter H, Aziz TZ. Deep brain stimulation for phantom limb pain. *J Clin Neurosci* 2005; 12: 399–404.

Blomstedt P, Fytigoridis A, Tisch S. Deep brain stimulation of the posterior subthalamic area in the treatment of tremor. *Acta Neurochir (Wien)* 2009; 151: 31–6.

Blomstedt P, Naesström M, Bodlund O. Deep brain stimulation in the bed nucleus of the stria terminalis and medial forebrain bundle in a patient with major depressive disorder and anorexia nervosa. *Clin Case Rep* 2017; 5: 679–84.

Boccard SGJ, Pereira EAC, Moir L, Aziz TZ, Green AL. Long-term outcomes of deep brain stimulation for neuropathic pain. *Neurosurgery* 2013; 72: 221–30. discussion 231.

Boivie J, Meyerson BA. A correlative anatomical and clinical study of pain suppression by deep brain stimulation. *Pain* 1982; 13: 113–26.

Boutin RCT, Alsahafi Z, Pagliardini S. Cholinergic modulation of the parafacial respiratory group: cholinergic modulation of active expiration. *J Physiol* 2017; 595: 1377–92.

Bracht T, Horn H, Strik W, Federspiel A, Schnell S, Höfle O, et al. White matter microstructure alterations of the medial forebrain bundle in melancholic depression. *J Affect Disord* 2014; 155: 186–93.

Broggi G, Franzini A, Tringali G, Ferroli P, Marras C, Romito L, et al. Deep brain stimulation as a functional scalpel. *Acta Neurochir Suppl* 2006; 99: 13–9.

Calabresi P, Picconi B, Tozzi A, Di Filippo M. Dopamine-mediated regulation of corticostriatal synaptic plasticity. *Trends Neurosci* 2007; 30: 211–9.

Caliandro P, Insola A, Scarnati E, Padua L, Russo G, Granieri E, et al. Effects of unilateral pedunculopontine stimulation on electromyographic activation patterns during gait in individual patients with Parkinson's disease. *J Neural Transm* 2011; 118: 1477–86.

Carter HH, Dawson EA, Cable NT, Basnayake S, Aziz T, Green AL, et al. Deep brain stimulation of the periaqueductal grey (PAG) induces vasodilation in humans. *Hypertension* 2011; 57: e24.

Ceravolo R, Brusa L, Galati S, Volterrani D, Peppe A, Siciliano G, et al. Low frequency stimulation of the nucleus tegmenti pedunculopontini increases cortical metabolism in parkinsonian patients. *Eur J Neurol* 2011; 18: 842–9.

Chiang MC, Bowen A, Schier LA, Tupone D, Uddin O, Heinricher MM. Parabrachial complex: a hub for pain and a version. *J Neurosci* 2019; 39: 8225–30.

Coenen VA, Bewernick BH, Kayser S, Kilian H, Bostro'm J, Greschus S, et al. Superolateral medial forebrain bundle deep brain stimulation in major depression: a gateway trial. *Neuropsychopharmacology* 2019; 44: 1224–32.

Coenen VA, Panksepp J, Hurwitz TA, Urbach H, Mädler B. Human medial forebrain bundle (MFB) and anterior thalamic radiation (ATR): imaging of two major subcortical pathways and the dynamic balance of opposite affects in understanding depression. *J Neuropsychiatry Clin Neurosci* 2012; 24: 223–36.

Coenen VA, Sajonz B, Reisert M, Bostroem J, Bewernick B, Urbach H, et al. Tractography-assisted deep brain stimulation of the superolateral branch of the medial forebrain bundle (sIMFB DBS) in major depression. *Neuroimage Clin* 2018; 20: 580–93.

Coenen VA, Schlaepfer TE, Bewernick B, Kilian H, Kaller CP, Urbach H, et al. Frontal white matter architecture predicts efficacy of deep brain stimulation in major depression. *Transl Psychiatry* 2019; 9: 197.

Coenen VA, Schlaepfer TE, Goll P, Reinacher PC, Voderholzer U, Tebartz van Elst L, et al. The medial forebrain bundle as a target for deep brain stimulation for obsessive-compulsive disorder. *CNS Spectr* 2017; 22: 282–9.

Coenen VA, Schumacher LV, Kaller C, Schlaepfer TE, Reinacher PC, Egger K, et al. The anatomy of the human medial forebrain bundle: ventral tegmental area connections to reward-associated subcortical and frontal lobe regions. *Neuroimage Clin* 2018; 18: 770–83.

Corner MA, Swaab DF. Progress in brain research. In: MA Corner, DF Swaab, editor(s). *Progress in brain research*. Amsterdam, New York: Elsevier; 1976. p. ii–x.

Cortelli P, Guaraldi P, Leone M, Pierangeli G, Barletta G, Grimaldi D, et al. Effect of deep brain stimulation of the posterior hypothalamic area on the cardiovascular system in chronic cluster headache patients. *Eur J Neurol* 2007; 14: 1008–15.

Costa A, Carlesimo GA, Caltagirone C, Mazzone P, Pierantozzi M, Stefani A, et al. Effects of deep brain stimulation of the pedunculopontine area on working memory tasks in patients with Parkinson's disease. *Parkinsonism Relat Disord* 2010; 16: 64–7.

Counts SE, Mufson EJ, Locus coeruleus. In: *The human nervous system*. London: Elsevier; 2012. p.425–38.

Damasio AR, Grabowski TJ, Bechara A, Damasio H, Ponto LLB, Parvizi J, et al. Subcortical and cortical brain activity during the feeling of self-generated emotions. *Nat Neurosci* 2000; 3: 1049–56.

DeLong M, Wichmann T. Deep brain stimulation for movement and other neurologic disorders. *Ann N Y Acad Sci* 2012; 1265: 1–8.

Dieckmann G, Witzmann A. Initial and long-term results of deep brain stimulation for chronic intractable pain. *Appl Neurophysiol* 1982; 45: 167–72.

Dinner DS, Neme S, Nair D, Montgomery EB, Baker KB, Rezai A, et al. EEG and evoked potential recording from the subthalamic nucleus for deep brain stimulation of intractable epilepsy. *Clin Neurophysiol* 2002; 113: 1391–402.

Dionne RA, Mueller GP, Young RF, Greenberg RP, Hargreaves KM, Gracely R, et al. Contrast medium causes the apparent increase in b-endorphin levels in human cerebrospinal fluid following brain stimulation. *Pain* 1984; 20: 313–21.

Drew T, Dubuc R, Rossignol S. Discharge patterns of reticulospinal and other reticular neurons in chronic, unrestrained cats walking on a treadmill. *J Neurophysiol* 1986; 55: 375–401.

Edlow BL, Takahashi E, Wu O, Benner T, Dai G, Bu L, et al. Neuroanatomic connectivity of the human ascending arousal system critical to consciousness and its disorders. *J Neuropathol Exp Neurol* 2012; 71: 531–46.

Farrell S, Green A, Aziz T. The current state of deep brain stimulation for chronic pain and its context in other forms of neuromodulation. *Brain Sci* 2018; 8: 158.

Fasano A, Aquino CC, Krauss JK, Honey CR, Bloem BR. Axial disability and deep brain stimulation in patients with Parkinson disease. *Nat Rev Neurol* 2015; 11: 98–110.

Feinstein B, Gleason CA, Libet B. Stimulation of locus coeruleus in man. Preliminary trials for spasticity and epilepsy. *Stereotact Funct Neurosurg* 1989; 52: 26–41.

Fenoy AJ, Schiess MC. Deep brain stimulation of the dentato-rubro-thalamic tract: outcomes of direct targeting for tremor. *Neuromodulation* 2017; 20: 429–36.

Fenoy AJ, Schulz P, Selvaraj S, Burrows C, Spiker D, Cao B, et al. Deep brain stimulation of the medial forebrain bundle: distinctive responses in resistant depression. *J Affect Disord* 2016; 203: 143–51.

Fenoy AJ, Schulz PE, Selvaraj S, Burrows CL, Zunta-Soares G, Durkin K, et al. A longitudinal study on deep brain stimulation of the medial forebrain bundle for treatment-resistant depression. *Transl Psychiatry* 2018; 8: 111.

Ferraye MU, Debu B, Fraix V, Goetz L, Ardouin C, Yelnik J, et al. Effects of pedunculopontine nucleus area stimulation on gait disorders in Parkinson's disease. *Brain* 2010; 133: 205–14.

Ferraye MU, Gerardin P, Debu B, Chabardes S, Fraix V, Seigneuret E, et al. Pedunculopontine nucleus stimulation induces monocular oscillopsia. *J Neurol Neurosurg Psychiatry* 2009; 80: 228–31.

Fisher R, Salanova V, Witt T, Worth R, Henry T, Gross R; the SANTE Study Group, et al. Electrical stimulation of the anterior nucleus of thalamus for treatment of refractory epilepsy. *Epilepsia* 2010; 51: 899–908.

Fontaine D, Lanteri-Minet M, Ouchchane L, Lazorthes Y, Mertens P, Blond S, et al. Anatomical location of effective deep brain stimulation electrodes in chronic cluster headache. *Brain* 2010; 133: 1214–23.

Fontaine D, Lazorthes Y, Mertens P, Blond S, Geraud G, Fabre N, et al. Safety and efficacy of deep brain stimulation in refractory cluster headache: a randomized placebo-controlled double-blind trial followed by a 1-year open extension. *J Headache Pain* 2010; 11: 23–31.

Foote SL, Aston-Jones G, Bloom FE. Impulse activity of locus coeruleus neurons in awake rats and monkeys is a function of sensory stimulation and arousal. *Proc Natl Acad Sci USA* 1980; 77: 3033–7.

Foote SL, Bloom FE, Aston-Jones G. Nucleus locus ceruleus: new evidence of anatomical and physiological specificity. *Physiol Rev* 1983; 63: 844–914.



Forsaa EB, Larsen JP, Wentzel-Larsen T, Alves G. A 12-year population-based study of freezing of gait in Parkinson's disease. *Parkinsonism Relat Disord* 2015; 21: 254–8.

Franzini A, Ferroli P, Leone M, Broggi G. Stimulation of the posterior hypothalamus for treatment of chronic intractable cluster headaches: first reported series. *Neurosurgery* 2003; 52: 1095–9. discussion 1099–1101.

Franzini A, Leone M, Messina G, Cordella R, Marras C, Bussone G, et al. Neuromodulation in treatment of refractory headaches. *Neurol Sci* 2008; 29: 65–8.

Franzini A, Marras C, Tringali G, Leone M, Ferroli P, Bussone G, et al. Chronic high frequency stimulation of the posteromedial hypothalamus in facial pain syndromes and behaviour disorders. *Acta Neurochir Suppl* 2007; 97: 399–406.

Franzini A, Messina G, Gambini O, Muffatti R, Scarone S, Cordella R, et al. Deep-brain stimulation of the nucleus accumbens in obsessive compulsive disorder: clinical, surgical and electrophysiological considerations in two consecutive patients. *Neurol Sci* 2010; 31: 353–9.

Franzini A, Messina G, Marras C, Villani F, Cordella R, Broggi G. Deep brain stimulation of two unconventional targets in refractory non-resectable epilepsy. *Stereotact Funct Neurosurg* 2008; 86: 373–81.

Franzini A, Messina G, Zekaj E, Romito L, Cordella R. Improvement of hand dexterity induced by stimulation of the pedunculopontine nucleus in a patient with advanced Parkinson's disease and previous long-lasting bilateral subthalamic DBS. *Acta Neurochir* 2011; 153: 1587–90.

Fuller PM, Saper CB, Lu J. The pontine REM switch: past and present: the pontine REM switch. *J Physiol* 2007; 584: 735–41.

Fytogoridis A, Blomstedt P. Complications and side effects of deep brain stimulation in the posterior subthalamic area. *Stereotact Funct Neurosurg* 2010; 88: 88–93.

Galanda M, Hovath S. Different effect of chronic electrical stimulation of the region of the superior cerebellar peduncle and the nucleus ventralis intermedius of the thalamus in the treatment of movement disorders. *Stereotact Funct Neurosurg* 1997; 69: 116–20.

Glasser MF, Sotiropoulos SN, Wilson JA, Coalson TS, Fischl B, Andersson JL, et al. The minimal preprocessing pipelines for the human connectome project. *Neuroimage* 2013; 80: 105–24.

Goetz L, Bhattacharjee M, Ferraye MU, Fraix V, Mainieri C, Nosko D, et al. Deep brain stimulation of the pedunculopontine nucleus area in Parkinson disease: MRI-based anatomoclinical correlations and optimal target. *Neurosurgery* 2019; 84: 506–18.

Gray AM, Pounds-Cornish E, Eccles FJR, Aziz TZ, Green AL, Scott RB. Deep brain stimulation as a treatment for neuropathic pain: a longitudinal study addressing neuropsychological outcomes. *J Pain* 2014; 15: 283–92.

Green AL, Hyam JA, Williams C, Wang S, Shlugman D, Stein JF, et al. Intra-operative deep brain stimulation of the periaqueductal grey matter modulates blood pressure and heart rate variability in humans. *Neuromodulation* 2010; 13: 174–81.

Green AL, Stone E, Sitsapesan H, Turney BW, Coote JH, Aziz TZ, et al. Switching off micturition using deep brain stimulation at midbrain sites. *Ann Neurol* 2012; 72: 144–7.

Green AL, Wang S, Bittar RG, Owen SLF, Paterson DJ, Stein JF, et al. Deep brain stimulation: a new treatment for hypertension? *J Clin Neurosci* 2007; 14: 592–5.

Green AL, Wang S, Owen SLF, Paterson DJ, Stein JF, Aziz TZ. Controlling the heart via the brain: a potential new therapy for orthostatic hypotension. *Neurosurgery* 2006; 58: 1176–83.

Green AL, Wang S, Owen SLF, Xie K, Bittar RG, Stein JF, et al. Stimulating the human midbrain to reveal the link between pain and blood pressure. *Pain* 2006; 124: 349–59.

Green AL, Wang S, Owen SLF, Xie K, Liu X, Paterson DJ, et al. Deep brain stimulation can regulate arterial blood pressure in awake humans. *Neuroreport* 2005; 16: 1741–5.

Green AL, Wang S, Stein JF, Pereira EAC, Kringelbach ML, Liu X, et al. Neural signatures in patients with neuropathic pain. *Neurology* 2009; 72: 569–71.

Greenberg BD, Malone DA, Friehs GM, Rezai AR, Kubu CS, Malloy PF, et al. Three-year outcomes in deep brain stimulation for highly resistant obsessive-compulsive disorder. *Neuropsychopharmacology* 2006; 31: 2384–93.

Habets JGV, Heijmans M, Kuijf ML, Janssen MLF, Temel Y, Kubben PL. An update on adaptive deep brain stimulation in Parkinson's disease: update on adaptive DBS in Parkinson's disease. *Mov Disord* 2018; 33: 1834–43.

Haines DE, Mihailoff GA. An overview of the brainstem. In: DE Haines, GA Mihailoff, editor(s). *Fundamental neuroscience for basic and clinical applications*. 5th edn. Philadelphia: Elsevier; 2018. p. 152–9.

Halliday G. Substantia nigra and locus coeruleus. In: G Paxinos, JK Mai, editor(s). *The human nervous system*. San Diego, London: Elsevier; 2004. p. 449–63.

Hollingworth M, Sims-Williams HP, Pickering AE, Barua N, Patel NK. Single electrode deep brain stimulation with dual targeting at dual frequency for the treatment of chronic pain: a case series and review of the literature. *Brain Sci* 2017; 7: 9.

Hamani C, McAndrews MP, Cohn M, Oh M, Zumsteg D, Shapiro CM, et al. Memory enhancement induced by hypothalamic/fornix deep brain stimulation. *Ann Neurol* 2008; 63: 119–23.

Hamani C, Schwab JM, Rezai AR, Dostrovsky CO, Davis KD, Lozano AM. Deep brain stimulation for chronic neuropathic pain: long-term outcome and the incidence of insertional effect. *Pain* 2006; 125: 188–96.

Harat M, Radziszewski K, Rudas M, Okon M, Galanda M. Clinical evaluation of deep cerebellar stimulation for spasticity in patients with cerebral palsy. *Neurol Neurochir Pol* 2009; 43: 36–44.

Harmsen IE, Elias GJB, Beyn ME, Boutet A, Pancholi A, Germann J, et al. Clinical trials for deep brain stimulation: current state of affairs. *Brain Stimul* 2020; 13: 378–85.

Hazrati L-N, Wong JC, Hamani C, Lozano AM, Poon Y-Y, Dostrovsky JO, et al. Clinicopathological study in progressive supra- nuclear palsy with pedunculopontine stimulation. *Mov Disord* 2012; 27: 1304–7.

Holstege G. Descending pathways from the periaqueductal gray and adjacent areas. In: A Depaulis, R Bandler, editor (s). *The midbrain periaqueductal gray matter*. Boston, MA: Springer US; 1991. p. 239–65.

Holtzheimer PE, Husain MM, Lisanby SH, Taylor SF, Whitworth LA, McClintock S, et al. Subcallosal cingulate deep brain stimulation for treatment-resistant depression: a multisite, randomised, sham-controlled trial. *Lancet Psychiatry* 2017; 4: 839–49.

Holtzheimer PE, Kelley ME, Gross RE, Filkowski MM, Garlow SJ, Barrocas A, et al. Subcallosal cingulate deep brain stimulation for treatment-resistant unipolar and bipolar depression. *Arch Gen Psychiatry* 2012; 69: 150–8.

Horisawa S, Arai T, Suzuki N, Kawamata T, Taira T. The striking effects of deep cerebellar stimulation on generalized fixed dystonia: case report. *J Neurosurg* 2020; 132: 712–6.

Horn AKE, Adamczyk C. Reticular formation: eye Movements, Gaze and Blinks. In: JK Mai, G Paxinos, editor(s). *The human nervous system*. 3rd edn. San Diego: Academic Press; 2012. p. 328–66.

Hosobuchi Y. Combined electrical stimulation of the periaqueductal gray matter and sensory thalamus. *Appl Neurophysiol* 1983; 46: 112–5.

Hosobuchi Y. Subcortical electrical stimulation for control of intractable pain in humans. Report of 122 cases (1970-1984). *J Neurosurg* 1986; 64: 543–53.

Hosobuchi Y. Dorsal periaqueductal gray-matter stimulation in humans. *Pacing Clin Electrophysiol* 1987; 10: 213–6.

Hosobuchi Y, Adams JE, Linchitz R. Pain relief by electrical stimulation of the central gray matter in humans and its reversal by naloxone. *Science* 1977; 197: 183–6.

Hosobuchi Y, Rossier J, Bloom F, Guillemin R. Stimulation of human periaqueductal gray for pain relief increases immunoreactive beta-endorphin in ventricular fluid. *Science* 1979; 203: 279–81.

Hyam JA, Brittain J-S, Paterson DJ, Davies RJO, Aziz TZ, Green AL. Controlling the lungs via the brain: a novel neurosurgical method to improve lung function in humans. *Neurosurgery* 2012a; 70: 469–77. discussion 477–478.

Hyam JA, Kringelbach ML, Silburn PA, Aziz TZ, Green AL. The autonomic effects of deep brain stimulation—a therapeutic opportunity. *Nat Rev Neurol* 2012b; 8: 391–400.

Insola A, Valeriani M, Mazzone P. Targeting the pedunculopontine nucleus: a new neurophysiological method based on somatosensory evoked potentials to calculate the distance of the deep brain stimulation lead from the Obex. *Neurosurgery* 2012; 71: 96–103.

Jagannathan S, Krovvidi H. Anaesthetic considerations for posterior fossa surgery. *Anaesthesia Crit Care Pa* 2014; 14: 202–6.

Jenkinson N, Brittain J-S, Hicks SL, Kennard C, Aziz TZ. On the origin of oscillopsia during pedunculopontine stimulation. *Stereotact Funct Neurosurg* 2012; 90: 124–9.

Katayama Y, Tsubokawa T, Hirayama T, Yamamoto T. Pain relief following stimulation of the pontomesencephalic parabrachial region in humans: brain sites for nonopiate-mediated pain control. *Stereotact Funct Neurosurg* 1985; 48: 195–200.

Katayama Y, Tsubokawa T, Yamamoto T, Hirayama T, Miyazaki S, Koyama S. Characterization and modification of brain activity with deep brain stimulation in patients in a persistent vegetative state: pain-related late positive component of cerebral evoked potential. *Pacing Clin Electro* 1991; 14: 116–21.

Katayama Y, Watkins LR, Becker DP, Hayes RL. Non-opiate analgesia induced by carbachol microinjection into the pontine parabrachial region of the cat. *Brain Res* 1984; 296: 263–83.

Kennedy SH, Giacobbe P, Rizvi SJ, Placenza FM, Nishikawa Y, Mayberg HS, et al. Deep brain stimulation for treatment-resistant depression: follow-up after 3 to 6 years. *Am J Psychiatry* 2011; 168: 502–10.

Khan S, Gill SS, Mooney L, White P, Whone A, Brooks DJ, et al. Combined pedunculopontine-subthalamic stimulation in Parkinson disease. *Neurology* 2012; 78: 1090–5.

Khan S, Javed S, Mooney L, White P, Plaha P, Whone A, et al. Clinical outcomes from bilateral versus unilateral stimulation of the pedunculopontine nucleus with and without concomitant caudal zona incerta region stimulation in Parkinson's disease. *Br J Neurosurg* 2012; 26: 722–5.

Khan S, Mooney L, Plaha P, Javed S, White P, Whone AL, et al. Outcomes from stimulation of the caudal zona incerta and pedunculopontine nucleus in patients with Parkinson's disease. *Br J Neurosurg* 2011; 25: 273–80.

Krauss JK, Loher TJ, Pohle T, Weber S, Taub E, Barlocher CB, et al. Pallidal deep brain stimulation in patients with cervical dystonia and severe cervical dyskinesias with cervical myelopathy. *J Neurol Neurosurg Psychiatry* 2002; 72: 249–56.

Kringelbach ML, Jenkinson N, Green AL, Owen SLF, Hansen PC, Cornelissen PL, et al. Deep brain stimulation for chronic pain investigated with magnetoencephalography. *Neuroreport* 2007; 18: 223–8.

Kulisevsky J, Berthier ML, Gironell A, Pascual-Sedano B, Molet J, Pares P. Mania following deep brain stimulation for Parkinson's disease. *Neurology* 2002; 59: 1421–4.

Kumar K, Toth C, Nath RK. Deep brain stimulation for intractable pain: a 15-year experience. *Neurosurgery* 1997; 40: 736–46. discussion 746–747.

Kumar K, Wyant GM, Nath R. Deep brain stimulation for control of intractable pain in humans, present and future: a ten-year follow-up. *Neurosurgery* 1990; 26: 774–81. discussion 781–782.

Laxton AW, Tang-Wai DF, McAndrews MP, Zumsteg D, Wennberg R, Keren R, et al. A phase I trial of deep brain stimulation of memory circuits in Alzheimer's disease. *Ann Neurol* 2010; 68: 521–34.

Lefranc M, Manto M, Merle P, Tir M, Montpellier D, Constant J-M, et al. Targeting the red nucleus for cerebellar tremor. *Cerebellum* 2014; 13: 372–7.

Leone M, Franzini A, Broggi G, Bussone G. Hypothalamic stimulation for intractable cluster headache: long-term experience. *Neurology* 2006; 67: 150–2.

Leone M, Franzini A, Broggi G, May A, Bussone G. Long-term follow-up of bilateral hypothalamic stimulation for intractable cluster headache. *Brain* 2004; 127: 2259–64.

Leone M, Franzini A, Broggi G, Mea E, Cecchini AP, Bussone G. Acute hypothalamic stimulation and ongoing cluster headache attacks. *Neurology* 2006; 67: 1844–5.

Leone M, Franzini A, Bussone G. Stereotactic stimulation of posterior hypothalamic gray matter in a patient with intractable cluster headache. *N Engl J Med* 2001; 345: 1428–9.

Leone M, Franzini A, D'Andrea G, Broggi G, Casucci G, Bussone G. Deep brain stimulation to relieve drug-resistant SUNCT. *Ann Neurol* 2005; 57: 924–7.

Leone M, Franzini A, Proietti Cecchini A, Bussone G. Success, failure, and putative mechanisms in hypothalamic stimulation for drug-resistant chronic cluster headache. *Pain* 2013; 154: 89–94.

Levy RM, Lamb S, Adams JE. Treatment of chronic pain by deep brain stimulation: long term follow-up and review of the literature. *Neurosurgery* 1987; 21: 885–93.

Lim AS, Moro E, Lozano AM, Hamani C, Dostrovsky JO, Hutchison WD, et al. Selective enhancement of rapid eye movement sleep by deep brain stimulation of the human pons. *Ann Neurol* 2009; 66: 110–4.

Löscher W, Ebert U, Lehmann H, Rosenthal C, Nikkhah G. Seizure suppression in kindling epilepsy by grafts of fetal GABAergic neurons in rat substantia nigra. *J Neurosci Res* 1998; 51: 196–209.

Lozano A, Lipsman N. Probing and regulating dysfunctional circuits using deep brain stimulation. *Neuron* 2013; 77: 406–24.

Lozano AM, Mayberg HS, Giacobbe P, Hamani C, Craddock RC, Kennedy SH. Subcallosal cingulate gyrus deep brain stimulation for treatment-resistant depression. *Biol Psychiatry* 2008; 64: 461–7.

Mallory GW, Abulseoud O, Hwang S-C, Gorman DA, Stead SM, Klassen BT, et al. The nucleus accumbens as a potential target for central poststroke pain. *Mayo Clin Proc* 2012; 87: 1025–31.

May A, Bahra A, Büchel C, Frackowiak RS, Goadsby PJ. Hypothalamic activation in cluster headache attacks. *Lancet* 1998; 352: 275–8.

Mayberg HS, Lozano AM, Voon V, McNeely HE, Seminowicz D, Hamani C, et al. Deep brain stimulation for treatment-resistant depression. *Neuron* 2005; 45: 651–60.

Mazzone P, Lozano A, Stanzione P, Galati S, Scarnati E, Peppe A, et al. Implantation of human pedunculopontine nucleus: a safe and clinically relevant target in Parkinson's disease. *Neuroreport* 2005; 16: 1877–81.

Mazzone P, Padua L, Falisi G, Insola A, Florio TM, Scarnati E. Unilateral deep brain stimulation of the pedunculopontine tegmental nucleus improves oromotor movements in Parkinson's disease. *Brain Stimul* 2012; 5: 634–41.

Mazzone P, Paoloni M, Mangone M, Santilli V, Insola A, Fini M, et al. Unilateral deep brain stimulation of the pedunculopontine tegmental nucleus in idiopathic Parkinson's disease: effects on gait initiation and performance. *Gait Posture* 2014; 40: 357–62.

Mazzone P, Sposato S, Insola A, Scarnati E. The clinical effects of deep brain stimulation of the pedunculopontine tegmental nucleus in movement disorders may not be related to the anatomical target, leads location, and setup of electrical stimulation. *Neurosurgery* 2013; 73: 894–906; discussion 905–906.

Mestre TA, Sidiropoulos C, Hamani C, Poon Y-Y, Lozano AM, Lang AE, et al. Long-term double-blinded unilateral pedunculopontine area stimulation in Parkinson's disease: a 4-Year blinded assessment of PPN stimulation for PD. *Mov Disord* 2016; 31: 1570–4.

Meyerson BA, Brodin E, Linderoth B. Possible neurohumoral mechanisms in CNS stimulation for pain suppression. *Stereotact Funct Neurosurg* 1985; 48: 175–80.

Mihailoff GA, Haines DE, Motor System II: corticofugal Systems and the Control of Movement. In: DE Haines, GA Mihailoff, editor(s). *Fundamental neuroscience for basic and clinical applications*. 5th edn. Elsevier; 2018. p. 360–376.e1.

Miller LE, Gibson AR, Red nucleus. In: LR Squire, editor(s). *Encyclopedia of neuroscience*. Oxford: Academic Press; 2009. p. 55–62.

Moro E, Lozano AM, Pollak P, Agid Y, Rehnrona S, Volkmann J, et al. Long-term results of a multicenter study on subthalamic and pallidal stimulation in Parkinson's disease. *Mov Disord* 2010; 25: 578–86.

Nandi D, Aziz T, Carter H, Stein J. Thalamic field potentials in chronic central pain treated by periventricular gray stimulation – a series of eight cases. *Pain* 2003; 101: 97–107.

Nandi D, Aziz TZ. Deep brain stimulation in the management of neuropathic pain and multiple sclerosis tremor. *J Clin Neurophysiol* 2004; 21: 31–9.

Nandi D, Liu X, Joint C, Stein J, Aziz T. Thalamic field potentials during deep brain stimulation of periventricular gray in chronic pain. *Pain* 2002; 97: 47–51.

Nandi D, Smith H, Owen S, Joint C, Stein J, Aziz T. Peri-ventricular grey stimulation versus motor cortex stimulation for post stroke neuropathic pain. *J Clin Neurosci* 2002; 9: 557–61.

Neudorfer C, Bhatia K, Boutet A, Germann J, Elias GJ, Loh A, et al. Endovascular deep brain stimulation: investigating the relationship between vascular structures and deep brain stimulation targets. *J Neurosurg* 2020; 13: 1668–77.

Nosko D, Ferraye MU, Fraix V, Goetz L, Chabarde's S, Pollak P, et al. Low-frequency versus high-frequency stimulation of the pedunculo-pontine nucleus area in Parkinson's disease: a randomised controlled trial. *J Neurol Neurosurg Psychiatry* 2015; 86: 674–9.

Nowacki A, Moir L, Owen SL, Fitzgerald JJ, Green AL, Aziz TZ. Deep brain stimulation of chronic cluster headaches: posterior hypothalamus, ventral tegmentum and beyond. *Cephalalgia* 2019; 39: 1111–20.

Nutt JG, Bloem BR, Giladi N, Hallett M, Horak FB, Nieuwboer A. Freezing of gait: moving forward on a mysterious clinical phenomenon. *Lancet Neurol* 2011; 10: 734–44.

Ostrem JL, Christine CW, Glass GA, Schrock LE, Starr PA. Pedunculo-pontine nucleus deep brain stimulation in a patient with primary progressive freezing gait disorder. *Stereotact Funct Neurosurg* 2010; 88: 51–5.

Owen SLF, Green AL, Davies P, Stein JF, Aziz TZ, Behrens T, et al. Connectivity of an effective hypothalamic surgical target for cluster headache. *J Clin Neurosci* 2007; 14: 955–60.

Owen SLF, Green AL, Stein JF, Aziz TZ. Deep brain stimulation for the alleviation of post-stroke neuropathic pain. *Pain* 2006; 120: 202–6.

Owen SLF, Heath J, Kringelbach M, Green AL, Pereira EAC, Jenkinson N, et al. Pre-operative DTI and probabilistic tractography in four patients with deep brain stimulation for chronic pain. *J Clin Neurosci* 2008; 15: 801–5.

Owen SLF, Heath J, Kringelbach ML, Stein JF, Aziz TZ. Preoperative DTI and probabilistic tractography in an amputee with deep brain stimulation for lower limb stump pain. *Br J Neurosurg* 2007; 21: 485–90.

Papuc E, Obszanska K, Trojanowski T, Szczepanska-Szerej H, Rejda K, Stelmasiak Z. Reduction of thalamic tremor with deep brain stimulation performed for post stroke chronic central pain. *Ann Agric Environ Med* 2013; Spec no.1: 45–7.

Parvizi J. Pathological laughter and crying: a link to the cerebellum. *Brain* 2001; 124: 1708–19.

Patel NK, Javed S, Khan S, Papouchado M, Malizia AL, Pickering AE, et al. Deep brain stimulation relieves refractory hypertension. *Neurology* 2011; 76: 405–7.

Paxinos G, Xu-Feng H, Sengul G, Watson C, Organization of Brainstem Nuclei. In: JK Mai, G Paxinos, editor(s). *The human nervous system*. 3rd edn. San Diego: Academic Press; 2012. p. 260–327.

Peppe A, Pierantozzi M, Baiamonte V, Moschella V, Caltagirone C, Stanzione P, et al. Deep brain stimulation of pedunculo-pontine tegmental nucleus: role in sleep modulation in advanced Parkinson disease patients: one-year follow-up. *Sleep* 2012; 35: 1637–42.

- Peppe A, Pierantozzi M, Chiavalon C, Marchetti F, Caltagirone C, Musicco M, et al. Deep brain stimulation of the pedunculopontine tegmentum and subthalamic nucleus: effects on gait in Parkinson's disease. *Gait Posture* 2010; 32: 512–8.
- Pereira EAC, Green AL, Bradley KM, Soper N, Moir L, Stein JF, et al. Regional cerebral perfusion differences between periventricular grey, thalamic and dual target deep brain stimulation for chronic neuropathic pain. *Stereotact Funct Neurosurg* 2007; 85: 175–83.
- Pereira EAC, Lu G, Wang S, Schweder PM, Hyam JA, Stein JF, et al. Ventral periaqueductal grey stimulation alters heart rate variability in humans with chronic pain. *Exp Neurol* 2010; 223: 574–81.
- Pereira EAC, Wang S, Owen SLF, Aziz TZ, Green AL. Human peri-ventricular grey somatosensory evoked potentials suggest rostrocaudally inverted somatotopy. *Stereotact Funct Neurosurg* 2013; 91: 290–7.
- Pereira EAC, Wang S, Paterson DJ, Stein JF, Aziz TZ, Green AL. Sustained reduction of hypertension by deep brain stimulation. *J Clin Neurosci* 2010; 17: 124–7.
- Pereira EAC, Wang S, Peachey T, Lu G, Shlugman D, Stein JF, et al. Elevated gamma band power in humans receiving naloxone suggests dorsal periaqueductal and periventricular gray deep brain stimulation produced analgesia is opioid mediated. *Exp Neurol* 2013; 239: 248–55.
- Perez-Lloret S, Negre-Pages L, Damier P, Delval A, Derkinderen P, Deste' A, et al. prevalence, determinants, and effect on quality of life of freezing of gait in Parkinson Disease. *JAMA Neurol* 2014; 71: 884.
- Phillips NI, Bhakta BB. Affect of deep brain stimulation on limb paresis after stroke. *Lancet* 2000; 356: 222–3.
- Pickering AE, Thornton SR, Love-Jones SJ, Steeds C, Patel NK. Analgesia in conjunction with normalisation of thermal sensation following deep brain stimulation for central post-stroke pain. *Pain* 2009; 147: 299–304.
- Pienaar IS, Vernon A, Winn P. The cellular diversity of the Pedunculopontine nucleus: relevance to behavior in health and aspects of Parkinson's disease. *Neuroscientist* 2017; 23: 415–31.
- Pinsker MO, Bartsch T, Falk D, Volkmann J, Herzog J, Steigerwald F, et al. Failure of deep brain stimulation of the posterior inferior hypothalamus in chronic cluster headache - report of two cases and review of the literature. *Zentralbl Neurochir* 2008; 69: 76–9.
- Plaha P, Gill SS. Bilateral deep brain stimulation of the pedunculopontine nucleus for Parkinson's disease. *Neuroreport* 2005; 16: 1883–7. Plotkin R, Results in 60 cases of deep brain stimulation for chronic intractable pain. In: M Brock, editor. *Modern neurosurgery 1*. Berlin, Heidelberg: Springer Berlin Heidelberg; 1982. p. 454–9.
- Prentice SD, Drew T. Contributions of the reticulospinal system to the postural adjustments occurring during voluntary gait modifications. *J Neurophysiol* 2001; 85: 679–98.
- Rasche D, Rinaldi PC, Young RF, Tronnier VM. Deep brain stimulation for the treatment of various chronic pain syndromes. *Neurosurg Focus* 2006; 21: 1–8.
- Rezai AR, Lozano AM, Crawley AP, Joy ML, Davis KD, Kwan CL, et al. Thalamic stimulation and functional magnetic resonance imaging: localization of cortical and subcortical activation with implanted electrodes. Technical Note. *J Neurosurg* 1999; 90: 583–90.
- Ricciardi L, Piano C, Rita Bentivoglio A, Fasano A. Pedunculopontine nucleus stimulation in Parkinson's disease dementia. *Biol Psychiatry* 2015; 77: e35.
- Richardson DE. Analgesia produced by stimulation of various sites in the human beta-endorphin system. *Stereotact Funct Neurosurg* 1982; 45: 116–22.
- Richardson DE, Akil H. Pain reduction by electrical brain stimulation in man. Part 1: acute administration in periaqueductal and periventricular sites. *J Neurosurg* 1977; 47: 178–83.
- Richardson DE, Akil H. Pain reduction by electrical brain stimulation in man. Part 2: chronic self-administration in the periventricular gray matter. *J Neurosurg* 1977; 47: 184–94.

Roh D, Chang WS, Chang JW, Kim C-H. Long-term follow-up of deep brain stimulation for refractory obsessive-compulsive disorder. *Psychiatry Res* 2012; 200: 1067–70.

Roizen MF, Newfield P, Eger EI, Hosobuchi Y, Adams JE, Lamb S. Reduced anesthetic requirement after electrical stimulation of periaqueductal gray matter. *Anesthesiology* 1985; 62: 120–3.

Romigi A, Placidi F, Peppe A, Pierantozzi M, Izzi F, Brusa L, et al. Pedunculopontine nucleus stimulation influences REM sleep in Parkinson's disease. *Eur J Neurol* 2008; 15: e64.

Schatzberg AF, Kraemer HC. Use of placebo control groups in evaluating efficacy of treatment of unipolar major depression. *Biol Psychiatry* 2000; 47: 736–44.

Schlaepfer TE, Bewernick BH, Kayser S, Mädler B, Coenen VA. Rapid effects of deep brain stimulation for treatment-resistant major depression. *Biol Psychiatry* 2013; 73: 1204–12.

Schlaepfer TE, Fins JJ. Deep brain stimulation and the neuroethics of responsible publishing: when one is not enough. *JAMA* 2010; 303: 775.

Schoenen J, Di Clemente L, Vandenhede M, Fumal A, De Pasqua V, Mouchamps M. Hypothalamic stimulation in chronic cluster headache: a pilot study of efficacy and mode of action. *Brain* 2005; 128: 940–7.

Schrader C, Seehaus F, Capelle HH, Windhagen A, Windhagen H, Krauss JK. Effects of pedunculopontine area and pallidal DBS on gait initiation in Parkinson's disease. *Brain Stimul* 2013; 6: 856–9.

Schüpbach WMM, Chabardes S, Matthies C, Pollo C, Steigerwald F, Timmermann L, et al. Directional leads for deep brain stimulation: opportunities and challenges: directional leads for DBS. *Mov Disord* 2017; 32: 1371–5.

Schweder PM, Joint C, Hansen PC, Green AL, Quaghebeur G, Aziz TZ. Chronic pedunculopontine nucleus stimulation restores functional connectivity. *Neuroreport* 2010; 21: 1065–8.

Sclocco R, Beissner F, Bianciardi M, Polimeni JR, Napadow V. Challenges and opportunities for brainstem neuroimaging with ultrahigh field MRI. *Neuroimage* 2018; 168: 412–26.

Semba K, Reiner PB, Fibiger HC. Single cholinergic mesopontine tegmental neurons project to both the pontine reticular formation and the thalamus in the rat. *Neuroscience* 1990; 38: 643–54.

Shih LC, Vanderhorst V, Papavassiliou E, Tarsy D. Sustained dyskinesias following elective cessation and reactivation of chronic subthalamic nucleus deep brain stimulation for a surgical procedure. *Neuromodulation* 2011; 14: 512–4. discussion 514.

Sims-Williams H, Matthews JC, Talbot PS, Love-Jones S, Brooks JC, Patel NK, et al. Deep brain stimulation of the periaqueductal gray releases endogenous opioids in humans. *Neuroimage* 2017; 146: 833–42.

Spooner J, Yu H, Kao C, Sillay K, Konrad P. Neuromodulation of the cingulum for neuropathic pain after spinal cord injury. Case report. *J Neurosurg* 2007; 107: 169–72.

Starr PA, Barbaro NM, Raskin NH, Ostrem JL. Chronic stimulation of the posterior hypothalamic region for cluster headache: technique and 1-year results in four patients. *J Neurosurg* 2007; 106: 999–1005.

Stefani A, Ceravolo R, Brusa L, Pierantozzi M, Costa A, Galati S, et al. Non-motor functions in parkinsonian patients implanted in the pedunculopontine nucleus: focus on sleep and cognitive domains. *J Neurol Sci* 2010a; 289: 44–8.

Stefani A, Galati S, Brusa L, Pierantozzi M, Peppe A, Stanzione P. Pathological gambling from dopamine agonist and deep brain stimulation of the nucleus tegmenti pedunculopontine. *BMJ Case Rep* 2010b; 2010: bcr0220102774.

Stefani A, Lozano AM, Peppe A, Stanzione P, Galati S, Tropepi D, et al. Bilateral deep brain stimulation of the pedunculopontine and subthalamic nuclei in severe Parkinson's disease. *Brain* 2007; 130: 1596–607.

Stefani A, Pierantozzi M, Ceravolo R, Brusa L, Galati S, Stanzione P. Deep brain stimulation of pedunculopontine tegmental nucleus (PPTg) promotes cognitive and metabolic changes: a target-specific effect or response to a low-frequency pattern of stimulation? *Clin EEG Neurosci* 2010; 41: 82–6.

Strafella AP, Lozano AM, Ballanger B, Poon Y-Y, Lang AE, Moro E. rCBF changes associated with PPN stimulation in a patient with Parkinson's disease: a PET study. *Mov Disord* 2008; 23: 1051–4.

Strumpf H, Noesselt T, Schoenfeld MA, Voges J, Panther P, Kaufmann J, et al. Deep brain stimulation of the pedunculopontine tegmental nucleus (PPN) influences visual contrast sensitivity in human observers. *Plos One* 2016; 11: e0155206.

Tasker RR, Vilela Filho O. Deep brain stimulation for neuropathic pain. *Stereotact Funct Neurosurg* 1995; 65: 122–4.

Thevathasan W, Cole MH, Graepel CL, Hyam JA, Jenkinson N, Brittain J-S, et al. A spatiotemporal analysis of gait freezing and the impact of pedunculopontine nucleus stimulation. *Brain* 2012; 135: 1446–54.

Thevathasan W, Coyne TJ, Hyam JA, Kerr G, Jenkinson N, Aziz TZ, et al. Pedunculopontine nucleus stimulation improves gait freezing in Parkinson disease. *Neurosurgery* 2011; 69: 1248–53. discussion 1254.

Thevathasan W, Pogossyan A, Hyam JA, Jenkinson N, Bogdanovic M, Coyne TJ, et al. A block to pre-prepared movement in gait freezing, relieved by pedunculopontine nucleus stimulation. *Brain* 2011; 134: 2085–95.

Thevathasan W, Silburn PA, Brooker H, Coyne TJ, Khan S, Gill SS, et al. The impact of low-frequency stimulation of the pedunculopontine nucleus region on reaction time in parkinsonism. *J Neurol Neurosurg Psychiatry* 2010; 81: 1099–104.

Tsubokawa T, Katayama Y, Yamamoto T, Hirayama T. Deafferentation pain and stimulation of the thalamic sensory relay nucleus: clinical and experimental study. *Stereotact Funct Neurosurg* 1985; 48: 166–71.

Tsubokawa T, Yamamoto T, Katayama Y, Hirayama T, Maejima S, Moriya T. Deep-brain stimulation in a persistent vegetative state: follow-up results and criteria for selection of candidates. *Brain Inj* 1990; 4: 315–27.

Tsubokawa T, Yamamoto T, Katayama Y, Hirayama T, Sibuya H. Thalamic relay nucleus stimulation for relief of intractable pain. Clinical results and beta-endorphin immunoreactivity in the cerebrospinal fluid. *Pain* 1984; 18: 115–26.

Ulla M, Thobois S, Lemaire J-J, Schmitt A, Derost P, Broussolle E, et al. Manic behaviour induced by deep-brain stimulation in Parkinson's disease: evidence of substantia nigra implication? *J Neurol Neurosurg Psychiatry* 2006; 77: 1363–6.

Ulla M, Thobois S, Llorca P-M, Derost P, Lemaire J-J, Chereau-Boudet I, et al. Contact dependent reproducible hypomania induced by deep brain stimulation in Parkinson's disease: clinical, anatomical and functional imaging study. *J Neurol Neurosurg Psychiatry* 2011; 82: 607–14.

Vesper J, Steinhoff B, Rona S, Wille C, Bilic S, Nikkhah G, et al. Chronic high-frequency deep brain stimulation of the STN/SNr for progressive myoclonic epilepsy. *Epilepsia* 2007; 48: 1984–9.

Vetrugno R, Pierangeli G, Leone M, Bussone G, Franzini A, Brogli G, et al. Effect on sleep of posterior hypothalamus stimulation in cluster headache. *Headache* 2007; 47: 1085–90.

Vilela Filho O. Risk factors for unpleasant paresthesiae induced by paresthesiae-producing deep brain stimulation. *Arq Neuro-Psiquiatr* 1996; 54: 57–63.

Walcott BP, Bamber NI, Anderson DE. Successful treatment of chronic paroxysmal hemicrania with posterior hypothalamic stimulation: technical case report. *Neurosurgery* 2009; 65: E997–E997.

Weiss D, Walach M, Meisner C, Fritz M, Scholten M, Breit S, et al. Nigral stimulation for resistant axial motor impairment in Parkinson's disease? A randomized controlled trial. *Brain* 2013; 136: 2098–108.

Welter M-L, Burbaud P, Fernandez-Vidal S, Bardinet E, Coste J, Piallat B; for the French 'Stimulation dans le Trouble Obsessionnel Compulsif (STOC)' Study Group, et al. Basal ganglia dysfunction in OCD: subthalamic neuronal activity correlates with symptoms severity and predicts high-frequency stimulation efficacy. *Transl Psychiatry* 2011; 1: e5.



- Welter M-L, Schupbach M, Czernecki V, Karachi C, Fernandez-Vidal S, Golmard J-L, et al. Optimal target localization for subthalamic stimulation in patients with Parkinson disease. *Neurology* 2014; 82: 1352–61.
- Wilcox RA, Cole MH, Wong D, Coyne T, Silburn P, Kerr G. Pedunclopontine nucleus deep brain stimulation produces sustained improvement in primary progressive freezing of gait. *J Neurol Neurosurg Psychiatry* 2011; 82: 1256–9.
- Wille C, Steinhoff BJ, Altenmuller D-M, Staack AM, Bilic S, Nikkhah G, et al. Chronic high-frequency deep-brain stimulation in progressive myoclonic epilepsy in adulthood—report of five cases. *Epilepsia* 2011; 52: 489–96.
- Yamamoto T, Katayama Y. Deep brain stimulation therapy for the vegetative state. *Neuropsychol Rehabil* 2005; 15: 406–13.
- Yamamoto T, Katayama Y, Kobayashi K, Oshima H, Fukaya C, Tsubokawa T. Deep brain stimulation for the treatment of vegetative state. *Eur J Neurosci* 2010; 32: 1145–51.
- Yamamoto T, Katayama Y, Obuchi T, Kobayashi K, Oshima H, Fukaya C. Deep brain stimulation and spinal cord stimulation for vegetative state and minimally conscious state. *World Neurosurg* 2013; 80: e1–e9.
- Yamamoto T, Katayama Y, Oshima H, Fukaya C, Kawamata T, Tsubokawa T. Deep brain stimulation therapy for a persistent vegetative state. *Acta Neurochir Suppl* 2002; 79: 79–82.
- Yamamoto T, Kobayashi K, Kasai M, Oshima H, Fukaya C, Katayama Y. DBS therapy for the vegetative state and minimally conscious state. *Acta Neurochir Suppl* 2005; 93: 101–4.
- Young RF, Bach FW, Van Norman AS, Yaksh TL. Release of beta-endorphin and methionine-enkephalin into cerebrospinal fluid during deep brain stimulation for chronic pain. Effects of stimulation locus and site of sampling. *J Neurosurg* 1993; 79: 816–25.
- Young RF, Brechner T. Electrical stimulation of the brain for relief of intractable pain due to cancer. *Cancer* 1986; 57: 1266–72.
- Young RF, Chambi VI. Pain relief by electrical stimulation of the periaqueductal and periventricular gray matter. Evidence for a non-opioid mechanism. *J Neurosurg* 1987; 66: 364–71.
- Young RF, Kroening R, Fulton W, Feldman RA, Chambi I. Electrical stimulation of the brain in treatment of chronic pain. Experience over 5 years. *J Neurosurg* 1985; 62: 389–96.
- Young RF, Tronnier V, Rinaldi PC. Chronic stimulation of the Kolliker-Fuse nucleus region for relief of intractable pain in humans. *J Neurosurg* 1992; 76: 979–85.
- Yousif N, Bhatt H, Bain PG, Nandi D, Seemungal BM. The effect of pedunclopontine nucleus deep brain stimulation on postural sway and vestibular perception. *Eur J Neurol* 2016; 23: 668–70.
